1 **A single dietary factor, daily consumption of a fermented beverage, can modulate the gut**  
2 **microbiome within the same ethnic community**

3 **Santanu Das<sup>a,b,#</sup>, Ezgi Özkurt<sup>c,d,#</sup>, Tulsi Kumari Joishy<sup>a</sup>, Dibyayan Deb<sup>a</sup>, Ashis K.**  
4 **Mukherjee<sup>a</sup>, Falk Hildebrand<sup>c,d\*</sup> Mojibur R. Khan<sup>a\*</sup>**

5 <sup>a</sup>Life Sciences Division, Institute of Advanced Study in Science and Technology (IASST), Gu-  
6 wahati-781035, Assam, India

7 <sup>b</sup>Department of Molecular Biology and Biotechnology, Cotton University, Guwahati- 781001,  
8 Assam, India

9 <sup>c</sup>Gut microbes and health, Quadram Institute Bioscience, Norwich, UK

10 <sup>d</sup>Digital Biology, Earlham Institute, Norwich, UK

11 # Both the authors have contributed equally

12

13 \*Corresponding authors:

14 Dr. M. R. Khan, Life Sciences Division, Institute of Advanced Study in Science and Technology  
15 (IASST), Guwahati-781035, Assam, India. Email: [mojibur.khan@gmail.com](mailto:mojibur.khan@gmail.com)

16 Dr. Falk Hildebrand, Gut Microbes & Health, Quadram Institute Bioscience, Norwich Research  
17 Park, Norwich, Norfolk, NR4 7UA, UK & Earlham Institute, Norwich ResearchPark, Nor-  
18 wich, Norfolk, NR4 7UA, UK. Email: [falk.hildebrand@quadram.ac.uk](mailto:falk.hildebrand@quadram.ac.uk)

19 **Abstract:**

20 In this study, the impact of traditional rice-based fermented alcoholic beverages (*Apong*) on the  
21 gut microbiome and health of the *Mishing* community in India was examined. Two groups that  
22 consumed one of these beverages were compared to a control group that did not consume either  
23 beverage. Gut microbial composition was analyzed by sequencing 16S rRNA of fecal  
24 metagenomes and analyzing untargeted fecal metabolites, and short-chain fatty acids (SCFAs).  
25 We also collected data on anthropometric measures and serum biochemical markers. Our results  
26 showed that *Apong* drinkers had higher blood pressure, but lower blood glucose and total protein  
27 levels than other non-drinkers. Also, gut microbiome composition was found to be affected by  
28 the choice of *Apong*, with *Apong* drinkers having a more diverse and distinct microbiome com-  
29 pared to non-drinkers. *Apong* drink type or being a non-drinker explained even a higher variation  
30 of fecal metabolome composition than microbiome composition and *Apong* drinkers had lower  
31 levels of the SCFA isovaleric acid than non-drinkers. Overall, this study shows that a single die-  
32 tary factor can significantly impact the gut microbiome of a community and highlights the poten-  
33 tial role of traditional fermented beverages in maintaining gut health.

34 **Key words:** Gut microbiome, alcoholic beverage, fermented beverage, short chain fatty acids,  
35 fecal metabolites

36

37

38

39

40 **Introduction:**

41 The gut microbiome is a collection of microorganisms in the human intestine that performs many  
42 important functions, including digestion, transformation of nutrients, and immune system regula-  
43 tion<sup>1</sup>. A well-balanced gut microbiome composition can provide health benefits, while imbalanc-  
44 es can lead to disorders related to metabolism and immunity<sup>2</sup>. The gut microbiome is influenced  
45 by various factors, including diet, medication, and age. Diet is a particularly important factor that  
46 affects the gut microbiome composition and its interactions with the host<sup>5-7</sup>. Fermented foods and  
47 beverages, such as yogurt, kefir, fermented cottage cheese, kimchi, and kombucha tea, are rich in  
48 microorganisms that can have an effect on the gut microbiome and increase overall microbial  
49 diversity<sup>8-12</sup>.

50 Rice-based fermented beverages are an important part of the diet and cultural heritage of Mon-  
51 golid communities in South-East Asia<sup>13</sup>. In Assam, India, the Mishing community consumes  
52 two types of rice-based alcoholic beverages called *Poro Apong* and *Nogin Apong*. *Poro Apong* is  
53 prepared with roasted rice, ash of rice husk, and a starter cake, and undergoes solid-state fermen-  
54 tation for 7-10 days. It is filtered through ash to produce a dark, clear liquid with physical and  
55 sensory properties similar to stout beer. *Nogin Apong* is made with steamed rice, and has physi-  
56 cal and sensory properties similar to *Maakoli*, a fermented beverage from South Korea. Within  
57 the Mishing community, some subgroups consume only one type of *Apong*, despite having simi-  
58 lar lifestyles and dietary habits. We previously found that *Nogin Apong* had a diverse array of  
59 lactic acid bacteria and was rich in saccharides and amino acids, while *Poro Apong* was domi-  
60 nated by *Lactobacillus*<sup>14</sup>. In this study, we aimed to determine how the different compositions of  
61 microbes and metabolites in these two types of *Apong* may affect the gut microbiome in volun-

62 teers from the same ethnicity who have similar dietary patterns, but differ in their choice of  
63 *Apong*.

## 64 **Results:**

### 65 ***Apong* drinkers have distinct levels of biochemical markers compared to non-drinkers, in-** 66 **cluding differences in blood pressure, glucose, protein levels, and liver enzymes**

67 Most individuals in this study had normal physiological and biochemical test results regardless  
68 of their lifestyles and dietary habits. However, blood pressure was significantly higher in *Poro*  
69 drinkers compared to the controls. (**Figure 1B, a-b**). Both *Nogin* and *Poro* drinkers had lower  
70 total protein and albumin levels in their blood than non-drinkers (**Figure 1B, c-d**), with *Nogin*  
71 drinkers having a lower albumin to globulin ratio (**Figure 1B, f**). Both *Nogin* and *Poro* drinkers  
72 also had lower blood glucose levels than non-drinkers (**Figure 1B, g**), which is consistent with  
73 the blood glucose-lowering properties of fermented foods and beverages<sup>15</sup>. Lipid levels, as  
74 measured by triglycerides, were within the normal range and comparable in all participants  
75 (**Figure 1B, h**). *Poro* drinkers had significantly lower levels of SGPT (**Figure 1B, i**) and SGOT  
76 (**Figure 1B, j**), which is a sign of a healthy liver<sup>16</sup>, and lower levels of bilirubin total and biliru-  
77 bin direct (**Figure 1B, k-l**). Although high bilirubin levels can indicate liver damage, low levels  
78 are not a concern for health.

79

### 80 **The gut microbiota composition varies between non-drinkers and *Apong* drinkers**

81 We compared the gut microbial composition of *Apong* drinkers and non-drinkers. We found sig-  
82 nificant differences between *Nogin* and *Poro* drinkers and drinkers and non-drinkers (**Figure**

83 **2A).** Overall, the participants were dominated by *Bacteroidota* and *Firmicutes*, with smaller pro-  
84 portions of *Proteobacteria*. However, while *Bacteroidata* made up a significant proportion of the  
85 gut bacterial community in *Nogin* drinkers and non-drinkers, it made up a smaller proportion in  
86 *Poro* drinkers. Notably, *Actinobacteria* was only detected in non-drinkers. Next, we identified  
87 taxa at the family level that significantly differed in abundance among the *Apong* drinkers and  
88 non-drinkers (**Figure 2B**). *Apong* drinkers had higher colonization by Enterobacteriaceae and  
89 Ruminococcaceae compared to non-drinkers. On the other hand, *Poro* drinkers had significantly  
90 less Prevotellaceae than *Nogin* drinkers and non-drinkers.

91 We also identified microbes that were specific to *Apong* drinkers (**Figure 2C**). To do this, we  
92 identified and compared ASVs that were detected in at least 50% of all participants at a mini-  
93 mum abundance of 0.1% in *Apong* drinkers and non-drinkers. Most of the ASVs were shared  
94 (n=52) among all participants and were part of the "core" microbiome. However, certain ASVs  
95 were only detected in *Nogin* (n=9) or *Poro* drinkers (n=6). Four of the *Poro*-specific ASVs were  
96 from the Lachnospiraceae family, while the others were from the Succinivibrionaceae family and  
97 an unknown family of Bacteroidales. The majority of the *Nogin*-specific ASVs were from the  
98 Prevotellaceae family (n=7), with the remaining ASVs coming from the *Ruminococcaceae* and  
99 *Enterobacteriaceae* families. The only ASV that was detected in non-drinkers but not in *Apong*  
100 drinkers was from the *Prevotellaceae* family.

101

102 **Gut microbial diversity in *Apong* drinkers is higher than in non-drinkers, and high-**  
103 **frequency *Nogin* drinkers have lower gut microbial diversity than other *Nogin* drinkers**

104 We estimated the gut microbial diversity in *Apong* drinkers and non-drinkers using three differ-  
105 ent diversity metrics (**Figure 3A**). Gut microbial diversity was significantly higher in the *Apong*  
106 drinkers than the non-drinkers.

107 We divided the participants into three categories based on their *Apong* consumption frequency:  
108 high (HD), medium (MD), and low (LD). *Poro* consumption frequency did not have an effect on  
109 microbial diversity (**Supplementary Figure 1**). However, among *Nogin* drinkers, high-  
110 frequency drinkers had significantly lower gut microbial diversity.

### 111 ***Apong* consumption and frequency has a significant effect in gut microbial composition**

112 We investigated microbial composition between participants by computing Bray-Curtis and  
113 weighted UniFrac beta-diversity (**Figure 3**). The distance matrices revealed small but significant  
114 differences among the non-drinkers, *Nogin* drinkers, and *Poro* drinkers, as well as among sub-  
115 groups of *Apong* drinkers based on frequency of consumption (**Figure 3A**).

116 Although location also had a significant effect on microbial composition, *Apong* usage had a  
117 larger overall effect. (**Figure 3A**). When blocking “location” in the perMANOVA, drink type  
118 (non-drinker vs. *Nogin*, or *Poro* drinker) still explains a significant portion of the variation in mi-  
119 crobial composition (Bray-Curtis:  $R^2= 0.034$ ;  $p= 0.003$  & Unifrac:  $R^2= 0.035$ ;  $p= 0.001$ ). Despite  
120 inhabiting the same location (Majuli), the gut microbial composition of non-drinkers ( $n=24$ ) and  
121 *Nogin* drinkers ( $n=18$ ) formed two different clusters of PCoAs ( $R^2= 4.79$ ;  $p=0.005$ )  
122 (**Supplementary Figure 2**).

123 Notably, blood serum biochemistry markers, such as total protein, albumin and globulin levels,  
124 and blood glucose and pressure, explained significant variation in the presence or absence of cer-  
125 tain microbes, but not in the phylogenetic diversity of gut microbial composition.

126

127 ***Nogin* drinkers have a more homogenous gut microbial community than *Poro* drinkers and**  
128 **non-drinkers**

129 The gut microbial community of *Nogin* drinkers clustered together in the principal coordinate  
130 analysis (PCoA) based on both weighted UniFrac and Bray-Curtis distances (**Figure 3C**). How-  
131 ever, non-drinkers and *Poro* drinkers had more heterogeneous microbial communities than *Nogin*  
132 drinkers. This was also demonstrated by the higher distance to centroid (Multivariate homoge-  
133 neity of groups dispersions) (**Figure 3D**), where *Nogin* drinkers had the lowest distance to cen-  
134 troid, so highest homogeneity whereas *Poro* drinkers had a high distance, so more heterogeneity  
135 in the weighted UniFrac distance (considers phylogenetic relatedness).

136

137 **Fecal microbial metabolite profiles are different between the *Apong* drinkers and non-**  
138 **drinkers**

139 To study the metabolic activity in the gut ecosystem of the cohorts, an untargeted metabolite pro-  
140 filing with GC-MS analysis was performed. Metabolites of microbial origins were identified us-  
141 ing the human metabolome database (HMDB) for subsequent analysis. We extracted a total of  
142 384 metabolites which comprises mainly amino acids, bile acids, fatty acids, indoles, and saccha-  
143 rides. *Apong* consumption led to depletion of certain metabolites, such as acetamid, benzestrol,

144 butanedioic acid, and cyclopropanecarboxylic acid, while *Poro* drinkers had higher levels of  
145 undecanoic acid than non-drinkers and *Nogin* drinkers (**Figure 4**).

146 We agglomerated gut microbes at family level and correlated these families to fecal metabolites  
147 using the mbOmic package in R<sup>17</sup>. We found 113 significant correlations (adjusted p-values <  
148 0.05) between microbial families and fecal metabolites. Only 23 of these correlations had a rho  
149 value higher than 0.70. Top ten correlations are listed in **Figure 5A**, and the majority of these  
150 correlations were with Clostridia or unknown Bacteroidota. All the correlations are listed in  
151 **Supplementary Table 1**.

152 Although having relatively heterogeneous gut microbial composition among participants (**Figure**  
153 **3C-D**), *Poro* drinkers had a highly uniform composition of fecal metabolites (**Figure 5B**). Drink  
154 type (non-drinker, *Nogin* drinker, or *Poro* drinker) had even a larger effect on metabolite compo-  
155 sition than on gut microbiome composition (**Figure 5C**).

156 Taken together, these results show that *Apong* drinkers had distinct blood serum markers, gut  
157 microbial composition, and fecal metabolites compared to non-drinkers.

158

159 ***Apong* consumers had lower levels of iso-valeric acid among their fecal SCFAs compared to**  
160 **non-drinkers**

161 The gut microbiota helps to break down undigested food through fermentation, producing short-  
162 chain fatty acids (SCFAs) as a result<sup>18</sup>. The SCFAs are important for gut homeostasis and health  
163 and their levels are affected by diet. Although BCFAs (branched-chain fatty acids) may be im-



164 portant in the gut and could potentially serve as markers of gut microbial metabolism, they have  
165 received less attention than the major SCFAs<sup>19</sup>.

166 We measured the levels of three major SCFAs and one BCFA (acetic acid, butyric acid, propion-  
167 ic acid, and iso-valeric acid) in fecal samples from both *Apong* drinkers and non-drinkers using  
168 HPLC. Propionic acid was the most abundant SCFA in both groups, while butyric acid was the  
169 least (**Figure 6**). Some volunteers had very high levels of acetic acid, but it was not correlated  
170 with any other data (**Supplementary Figure 3**). Isovaleric acid, a BCFA and considered to be  
171 harmful to the colon epithelium<sup>20</sup>, was significantly lower in *Apong* drinkers compared to non-  
172 drinkers, but there was no significant difference for the other SCFAs (**Figure 6**).

173

## 174 **Discussion**

175 The composition of the gut microbiome is influenced by various factors, including diet and life-  
176 style<sup>4, 21-23</sup>, but the impact of a single component of diet within a population of the same ethnicity  
177 on the gut microbiome has not been studied before. This study investigates the effect of two  
178 types of a traditional, rice-based fermented alcoholic beverage (*Apong*) on the gut microbiome  
179 and health of the *Mishing* community in India. All volunteers in the study were of the same eth-  
180 nicity, healthy, and had similar dietary habits, except for being an *Apong* drinker or not.

181 Our study showed that the composition of the gut microbiome is affected by the choice of  
182 *Apong*. Despite the frequent consumption of an alcoholic beverage, the volunteers in the study  
183 had normal BMI and healthy vital organ function. Previous research has shown that both varie-  
184 ties of *Apong* contain mild alcohol (~10%) and have a high content of phenolics<sup>14</sup>.

185 This study found that *Apong* consumers had a more diverse gut microbiome compared to the  
186 non-drinkers, which had a stable community with fewer ASVs. This suggests that a single die-  
187 tary factor alone can significantly impact the gut microbiome of a community, consistent with  
188 previous research on the gut microbiome of children in Burkina Faso<sup>24</sup>. Our study also observed  
189 a strong association between variation in microbial composition and blood glucose levels and  
190 blood pressure, which has not been reported in previous studies. Further research is needed to  
191 understand the causal relationship between these factors and gut bacterial diversity, which may  
192 allow for the development of microbiome-based biomarkers for predicting lifestyle diseases.

193 In this study, the gut microbiome of the *Mishing* community was found to be dominated by the  
194 *Prevotellaceae* family, a signature of the Indian population<sup>25-30</sup>, which has been previously asso-  
195 ciated with a vegetarian or carbohydrate-rich diet<sup>7</sup>. However, *Poro* drinkers had lower levels of  
196 *Prevotellaceae* than non-drinkers and *Nogin* drinkers, even though their gut microbiomes were  
197 colonized to a high extent by *Prevotellaceae*.

198 Lastly, we found that the gut microbiome of the *Mishing* population was colonized to a high ex-  
199 tent by *Succinivibrio*, a bacterium not previously reported in the Indian population<sup>25-27</sup>. This bac-  
200 terium is commonly found among hunter-gatherers and foragers<sup>31, 32</sup>. The presence of  
201 *Succinivibrio* in the microbiome was previously reported in the *Hadza* hunter gatherers and tradi-  
202 tional Peruvian populations<sup>31,33</sup>. We speculate that the high abundance of *Succinivibrio* in the  
203 *Mishing* population may be due to co-habitation with domesticated animals. The co-presence of  
204 butyrate producers and other essential gut bacteria along with expected levels of SCFAs but low-  
205 er levels of BCFA and blood serum measurements suggests that *Apong* does not have a detri-  
206 mental effect on the structure and function of the gut microbiome.

207 **Conclusion:** In conclusion, this study found that the choice of *Apong*, a traditional rice-based  
208 fermented alcoholic beverage, significantly impacts the gut microbiome composition and blood  
209 serum markers in the *Mishing* community in India. The gut microbiomes of *Apong* consumers  
210 were more diverse than those of non-drinkers, and *Poro* drinkers had lower levels of  
211 Prevotellaceae than non-drinkers and *Nogin* drinkers. The gut microbiome of the *Mishing* com-  
212 munity was also colonized by *Succinivibrio*, a bacterium not previously reported in the Indian  
213 population. The differences in gut metabolites between *Apong* drinkers and non-drinkers were  
214 even greater than those in the gut microbiome. These findings suggest that a single dietary factor  
215 can significantly impact the gut of a population and highlight the need for further research on the  
216 causal relationship between these factors and gut bacterial diversity for the development of  
217 microbiome-based biomarkers for predicting lifestyle diseases.

218

219

## 220 **Materials and methods**

### 221 **Materials**

222 All the reagents, media and chemicals used in this study were of analytical grade. RNA-later so-  
223 lution (Cat. No RM49049), short chain fatty acids standards viz. Acetic acid (Cat. No.  
224 5438080100), Butyric acid (Cat. No 19215), Isovaleric acid (Cat. No 78651), and Propionic acid  
225 (Cat No. 94425) were procured from Sigma-Aldrich, USA. QiAmp DNA stool mini kit (Cat. No:  
226 19590) was procured from Qiagen Inc, Germany. Blood collection vials K3-EDTA vial (Cat. No  
227 368860) and clot vials (Cat. No 368975) were procured from BD Diagnostics, Oxford, UK.

228 Blood serum biomarkers kits were procured from CCS ® Coral Clinical Systems, Tulip Diagnos-  
229 tics (P) Ltd., Goa, India.

### 230 **Ethics statement**

231 This study was approved by the Ethics Committee of the Institute of Advanced Study in Sci-  
232 ence Technology (IASST), Guwahati, India (Approval number: IEC(HS)/IASST/1082/2014-  
233 15/6) and was conducted following the guidelines and regulations. Written informed consents  
234 were taken from the volunteers along with some standard questionnaires.

### 235 **Study sites, volunteers, and sample collection**

236 In this study, potential volunteers were identified through an electoral database and surveyed in  
237 locations dominated by the *Mishing* community. The control group consisted of individuals who  
238 do not consume *Apong* but follow the same dietary pattern, while the experimental group includ-  
239 ed 166 individuals from the *Mishing* community and 24 individuals from a Vaishnavite satra  
240 with slightly different dietary habits. A bi-lingual survey questionnaire was used to collect in-  
241 formation on dietary patterns, age, sex, medical history, family lineage, and demographics. In-  
242 clusion criteria were age (18-50 years) and ethnicity, while exclusion criteria were the use of an-  
243 tibiotics, health supplements and other drugs, consumption of any other liquor except *Apong*, and  
244 medical history. The *Mishing* population was stratified based on the amount of rice beer con-  
245 sumed per week, with non-drinkers classified as those who did not consume *Apong*, low-drinkers  
246 as those who consumed less than 250 ml, medium-drinkers as those who consumed 250-500 ml,  
247 and high-drinkers as those who consumed more than 500 ml per day. The control group included  
248 monks from *Vaishnavite* satras, who avoided alcoholic beverages and red meat but consumed  
249 fish as part of their regular diet.

250 Fecal and blood samples were collected from the Mishing population living in the Telam,  
251 Dhemaji, and Majuli districts of Assam. A customized kit was used to collect fecal samples, with  
252 one container, including 2 ml of RNA later solution, used for DNA extraction and another for  
253 metabolomics studies. Three ml of blood was withdrawn from individuals by a phlebotomist.  
254 Blood was collected in a K3-EDTA vial and clot vials to separate plasma and serum, respective-  
255 ly. All the samples were immediately frozen after collection and were transported to the labora-  
256 tory in frozen condition. Fecal and blood samples were stored at -80 °C, until processed. In addi-  
257 tion to the samples and questionnaires, anthropometric data such as height, weight, BMI, and  
258 blood group were also collected from the volunteers.

#### 259 **Analysis of biochemical parameters of plasma and serum**

260 The plasma samples were analyzed using standard biochemical assay kits (CCS ® Coral Clinical  
261 Systems, Tulip Diagnostics (P) Ltd., Goa, India), following the manufacturer's instructions. Se-  
262 rum glucose, HDL cholesterol, albumin, globulin, total protein, and liver function tests, for ex-  
263 ample, serum glutamic oxaloacetic transaminase (SGOT), serum glutamic pyruvic transaminase  
264 (SGPT), and alkaline phosphatase (ALP), direct and total bilirubin contents were determined.

#### 265 **DNA extraction from faecal sample**

266 DNA extraction was performed within 72 h of faecal sample collection. QiAmp DNA stool mini  
267 kit (Cat. No: 19590 Qiagen Inc, Germany) was used for the extraction of metagenomic DNA  
268 from the faecal samples following the manufacturer's instruction. Briefly, a 400 µl of faecal  
269 sample was mixed to 1400 µl of ASL buffer (provided with the kit) and incubated at 90 °C for 10

270 min. The supernatant was collected after brief centrifugation at 13,000 rpm for 2 min, to which  
271 Inhibitex tablet and ProteinaseK (supplied with the kit) were added. After a short incubation of  
272 10 min at 70 °C, the mixture was centrifuged at 13,000 rpm for 3 min. The supernatant was col-  
273 lected in a filter with a silica column. The column was washed twice with a wash buffer (provid-  
274 ed with the kit) and the bound DNA was eluted with a preheated elution buffer (supplied with the  
275 kit). The amount of dsDNA was quantified using a dsDNA estimation kit with a Fluorometer  
276 (Quantiflour, Promega, Madison, USA).

### 277 **Library preparation, 16S rDNA amplicon sequencing and analyses**

278 The V3-V4 region of the 16S rDNA was amplified using the primer pairs 341F & 805R<sup>344†</sup>. The  
279 indexing and library preparation of the amplified DNA fragments were carried out using Nextera  
280 XT library preparation and indexing kits according to the Illumina MiSeq protocol<sup>35</sup>. DNA frag-  
281 ments were multiplexed and subjected to 2 X 300 bp paired-end sequencing in an Illumina  
282 MiSeq machine with the sequencing service provider (Macrogen Inc., Seoul, Republic of Korea).

### 283 **Bioinformatics analyses of the amplicon dataset**

284 The paired-end reads generated from Illumina sequencing were processed using the LotuS2 pipe-  
285 line<sup>36</sup>. Reads having less than 170 bases in length were filtered out from the analysis. In LotuS2,  
286 DADA2 algorithm<sup>37</sup> was used to cluster sequences into amplicon sequence variants (ASVs). Us-  
287 ing the options for LULU (-lulu)<sup>3845</sup> and UNCROSS2 (-xtalk), sequence clusters were curated  
288 and refined. ASVs were aligned with Lambda<sup>39</sup> to SILVA 138.1<sup>40</sup>, to obtain taxonomic assign-  
289 ments for ASVs using the LotuS2 LCA algorithm. Otherwise, default options in LotuS2 were

290 used. As a result, 28,083,099 total reads were clustered into 7550 ASVs in the final matrix,  
291 summing to 14,893,374 reads after quality filtering and removal of contaminants<sup>41</sup>.

292 The processed samples were further analysed with phyloseq package<sup>42</sup> in R (version 3.6.1).  
293 Samples were rarefied to an even depth using the rtk tool<sup>43</sup> for diversity analysis. For estimation  
294 and calculation of diversity indices, vegan<sup>44</sup> package was used.

## 295 **Metabolomics analyses of fecal samples**

296 The following techniques were used for the analyses of fecal samples.

### 297 **Gas chromatography-mass spectroscopy (GC-MS) analysis**

298 Untargeted fecal metabolite profiles were determined by GC-MS analysis. A 40 mg of lyophi-  
299 lized fecal sample was extracted with 1 ml of HPLC grade methanol (Merck, Mumbai, India)  
300 and kept in a shaker overnight at 1200 rpm. The sample was centrifuged at 10000 rpm for 10 min  
301 at 10°C. The extract was then dried at room temperature using a vacuum desiccator and re-  
302 suspended in a mixture of 40 µl of pyridine and 20 mg/ml of methoxyamine hydrochloride. After  
303 a brief vortex, the solution was incubated at 30 °C for 90 min and then derivatized with 20 µl of  
304 N- methyl-N-trimethylsilyltrifluoroacetamide with 1% trimethylchlorosilane (Merck, USA) at 70  
305 °C for 30 min<sup>54</sup>. The sample was then centrifuged at 3000 rpm for 5 min and used for GC-MS  
306 analysis.

307 Samples were run in a Shimadzu GC 2010Plus-triple quadrupole (TP-8030) system fitted with an  
308 EB-5MS column (length: 30 m, thickness: 0.25 µm, ID: 0.25 mm). A 1 µl of the sample was in-  
309 jected in split less mode at 300°C using helium as carrier gas at a 1 ml/min flow rate. The oven  
310 program was set at 70°C initially, ramped at 1°C/min for 5 min up to 75°C. Subsequently, it was

311 increased at 10°C/min up to 150 °C, and held for 5 min, followed by increasing at the same rate  
312 up to 300 °C and held for 5 min. The mass spectrometer was operated at a continuous scan from  
313 45 to 600 m/z in the electron ionization (EI) mode at 70ev with 200 °C as the source tempera-  
314 ture. Peak identification was performed using the National Institute of Standards and Technology  
315 library, USA, by matching the mass spectra.

### 316 **Quantification of faecal short-chain fatty acids (SCFAs) by RP-HPLC analysis**

317 Faecal samples were lyophilized, and 100 mg of each sample was dissolved in a solvent prepared  
318 using acetonitrile (Cat. No 271004 Merck Millipore, Germany) and 10-mM KH<sub>2</sub>PO<sub>4</sub> (pH 2.4)  
319 (Cat. No P5379, Sigma Aldrich, USA) in 1:1 ratio. The solutions were then vortexed vigorously  
320 for 5 min. ensuring proper mixture, centrifuged at 4000 rpm for 5 min. The supernatant was col-  
321 lected and filtered through a 0.22 µm syringe filter for downstream analysis.

322 Quantification of the organic acids was carried out in an analytical HPLC instrument (Waters,  
323 USA) with 5 µm ODS2 (4.6 x 250 mm, Waters SPHERISORB) reversed- phase C18 analytical  
324 column. Two HPLC grade solvents (solvent A was 10-mM KH<sub>2</sub>PO<sub>4</sub>, pH 2.4 with phosphoric ac-  
325 id, while solvent B was 100% acetonitrile) were used in a gradient system with a flow rate of 1.5  
326 ml/min. The absorbance of the eluted compound was monitored at 210 nm by the PDA detector.

### 327 **Statistical analyses:**

328 All the statistical tests were performed in the R platform by using base functions and calling spe-  
329 cialized packages such as phyloseq<sup>42</sup>, vegan<sup>44</sup>, microeco<sup>45</sup>, microbiome<sup>46</sup>, microbiomeutilities<sup>10</sup>,  
330 mbOmic<sup>17</sup>, rstatix<sup>51</sup>. Comparisons among the anthropometric measures and serum biochemical  
331 markers were carried out using the Kruskal-Wallis test. To compare the microbial diversity



332 among *Apong* drinkers and non-drinkers, the samples were first rarefied to an equal depth. Then,  
333 the alpha diversity indices were calculated for each sample, including the number of unique fea-  
334 tures (richness), the Shannon diversity, and Chao1 metric. To determine if there were significant  
335 differences in microbial diversity among *Apong* drinkers and non-drinkers, a Kruskal-Wallis test  
336 was performed. Before calculating the beta distance (Bray-Curtis and weighted UniFrac), the ta-  
337 ble was normalized to relative abundances. “adonis” and “mantel” functions in the vegan package  
338 were used to run PERMANOVA (Permutational Multivariate Analysis of Variance) and Mantel  
339 tests to calculate metadata variables explaining variation based on beta diversity distances.  
340 “betadisper” function in the vegan package was used to estimate the homogeneity of drink types  
341 groups in the PCoAs. The “corr” function from the mbOmic package was used to calculate Pear-  
342 son correlations between the metabolomics data and microbial taxa at the family level and ad-  
343 justed p values for multiple comparisons were used.

344 **Acknowledgement:** The authors acknowledge the Institutional Level Biotech Hub (DBT, Govt.  
345 of India) and Central instrumentation facility of IASST for providing the facilities. This research  
346 was funded by Department of Biotechnology (DBT) under Unit of Excellence Project  
347 (BT/550/NE/U-Excel/2014) and SC/ST community development programme in IASST  
348 (SEED/TITE/2019/103) funded by DST, Govt. of India. SD is thankful to IASST for providing  
349 financial support to carry out research work. The authors also acknowledge Mr. Pinku  
350 Rajbongshi for assisting in collection of blood samples. We are thankful to Mr. Dhruvajyoti  
351 Regon, Mr. James Doley, Mr. Deepak Mili and Mr. Samujjal Saikia for assistance in recruitment  
352 of volunteers and sample collection. EO, FH were supported by European Research Council  
353 H2020 StG (erc-stg-948219, EPYC). CF, RA, EO, FH were supported by the Biotechnology and  
354 Biological Sciences Research Council (BBSRC) Institute Strategic Programme Gut Microbes

355 and Health BB/r012490/1 and its constituent project BBS/e/F/000Pr10355, Core Capability  
356 Grant BB/CCG1720/1 and the work delivered via the Scientific Computing group, as well as  
357 support for the physical HPC infrastructure and data centre delivered via the NBI Computing in-  
358 frastructure for Science (CiS) group.

359 **Availability of data:** Sequencing data are available on the NCBI SRA server under the  
360 BioProject ID: PRJNA906264

361

362

363

#### 364 **REFERENCES:**

365

366 1. Cani PD. Human gut microbiome: hopes, threats and promises. *Gut* 2018; 67:1716-25.

367 2. Heintz-Buschart A, Wilmes P. Human Gut Microbiome: Function Matters. *Trends in mi-*  
368 *crobiology* 2018; 26:563-74.

369 3. Hildebrand F, Gossmann TI, Frioux C, Özkurt E, Myers PN, Ferretti P, et al. Dispersal  
370 strategies shape persistence and evolution of human gut bacteria. *Cell host & microbe* 2021;  
371 29:1167-76.e9.

372 4. Spor A, Koren O, Ley R. Unravelling the effects of the environment and host genotype  
373 on the gut microbiome. *Nature reviews Microbiology* 2011; 9:279-90.

374 5. Xu Z, Knight R. Dietary effects on human gut microbiome diversity. *The British journal*  
375 *of nutrition* 2015; 113 Suppl:S1-5.

376 6. Hasan N, Yang H. Factors affecting the composition of the gut microbiota, and its modu-  
377 lation. *PeerJ* 2019; 7:e7502.

- 378 7. David LA, Maurice CF, Carmody RN, Gootenberg DB, Button JE, Wolfe BE, et al. Diet  
379 rapidly and reproducibly alters the human gut microbiome. *Nature* 2014; 505:559-63.
- 380 8. Tanes C, Bittinger K, Gao Y, Friedman ES, Nessel L, Paladhi UR, et al. Role of dietary  
381 fiber in the recovery of the human gut microbiome and its metabolome. *Cell host & microbe*  
382 2021; 29:394-407.e5.
- 383 9. Melini F, Melini V, Luziatelli F, Ficca AG, Ruzzi M. Health-Promoting Components in  
384 Fermented Foods: An Up-to-Date Systematic Review. *Nutrients* 2019; 11.
- 385 10. Taylor BC, Lejzerowicz F, Poirel M, Shaffer JP, Jiang L, Aksenov A, et al. Consumption  
386 of Fermented Foods Is Associated with Systematic Differences in the Gut Microbiome and  
387 Metabolome. *mSystems* 2020; 5.
- 388 11. Lee JE, Ha JS, Park HY, Lee E. Alteration of gut microbiota composition by short-term  
389 low-dose alcohol intake is restored by fermented rice liquor in mice. *Food research international*  
390 (Ottawa, Ont) 2020; 128:108800.
- 391 12. Le Roy CI, Kurilshikov A, Leeming ER, Visconti A, Bowyer RCE, Menni C, et al. Yo-  
392 ghurt consumption is associated with changes in the composition of the human gut microbiome  
393 and metabolome. *BMC Microbiol* 2022; 22:39.
- 394 13. Green R, Milner J, Joy EJ, Agrawal S, Dangour AD. Dietary patterns in India: a system-  
395 atic review. *The British journal of nutrition* 2016; 116:142-8.
- 396 14. Das S, Deb D, Adak A, Khan MR. Exploring the microbiota and metabolites of tradition-  
397 al rice beer varieties of Assam and their functionalities. *3 Biotech* 2019; 9:174.
- 398 15. Kok CR, Hutkins R. Yogurt and other fermented foods as sources of health-promoting  
399 bacteria. *Nutrition reviews* 2018; 76:4-15.

- 400 16. Cohen JA, Kaplan MM. The SGOT/SGPT ratio--an indicator of alcoholic liver disease.  
401 Digestive diseases and sciences 1979; 24:835-8.
- 402 17. McHardy IH, Goudarzi M, Tong M, Ruegger PM, Schwager E, Weger JR, et al. Integra-  
403 tive analysis of the microbiome and metabolome of the human intestinal mucosal surface reveals  
404 exquisite inter-relationships. Microbiome 2013; 1:17.
- 405 18. van der Beek CM, Dejong CHC, Troost FJ, Masclee AAM, Lenaerts K. Role of short-  
406 chain fatty acids in colonic inflammation, carcinogenesis, and mucosal protection and healing.  
407 Nutrition reviews 2017; 75:286-305.
- 408 19. Rios-Covian D, González S, Nogacka AM, Arboleya S, Salazar N, Gueimonde M, et al.  
409 An Overview on Fecal Branched Short-Chain Fatty Acids Along Human Life and as Related  
410 With Body Mass Index: Associated Dietary and Anthropometric Factors. 2020; 11.
- 411 20. Vieira ADS, de Souza CB, Padilha M, Zoetendal EG, Smidt H, Saad SMI, et al. Impact  
412 of a fermented soy beverage supplemented with acerola by-product on the gut microbiota from  
413 lean and obese subjects using an in vitro model of the human colon. Appl Microbiol Biotechnol  
414 2021; 105:3771-85.
- 415 21. Penders J, Thijs C, Vink C, Stelma FF, Snijders B, Kummeling I, et al. Factors influenc-  
416 ing the composition of the intestinal microbiota in early infancy. Pediatrics 2006; 118:511-21.
- 417 22. Koenig JE, Spor A, Scalfone N, Fricker AD, Stombaugh J, Knight R, et al. Succession of  
418 microbial consortia in the developing infant gut microbiome. Proceedings of the National Acad-  
419 emy of Sciences of the United States of America 2011; 108 Suppl 1:4578-85.
- 420 23. O'Hara AM, Shanahan F. The gut flora as a forgotten organ. EMBO reports 2006; 7:688-  
421 93.

- 422 24. De Filippo C, Di Paola M, Ramazzotti M, Albanese D, Pieraccini G, Banci E, et al. Diet,  
423 Environments, and Gut Microbiota. A Preliminary Investigation in Children Living in Rural and  
424 Urban Burkina Faso and Italy. *Front Microbiol* 2017; 8:1979.
- 425 25. Dehingia M, Devi KT, Talukdar NC, Talukdar R, Reddy N, Mande SS, et al. Gut bacteri-  
426 al diversity of the tribes of India and comparison with the worldwide data. *Scientific reports*  
427 2015; 5:18563.
- 428 26. Bhute S, Pande P, Shetty SA, Shelar R, Mane S, Kumbhare SV, et al. Molecular Charac-  
429 terization and Meta-Analysis of Gut Microbial Communities Illustrate Enrichment of *Prevotella*  
430 and *Megasphaera* in Indian Subjects. *Front Microbiol* 2016; 7:660.
- 431 27. Dhakan DB, Maji A, Sharma AK, Saxena R, Pulikkan J, Grace T, et al. The unique com-  
432 position of Indian gut microbiome, gene catalogue, and associated fecal metabolome deciphered  
433 using multi-omics approaches. *GigaScience* 2019; 8.
- 434 28. Maji A, Misra R, Dhakan DB, Gupta V, Mahato NK, Saxena R, et al. Gut microbiome  
435 contributes to impairment of immunity in pulmonary tuberculosis patients by alteration of butyri-  
436 ate and propionate producers. *Environmental microbiology* 2018; 20:402-19.
- 437 29. Das B, Ghosh TS, Kedia S, Rampal R, Saxena S, Bag S, et al. Analysis of the Gut  
438 Microbiome of Rural and Urban Healthy Indians Living in Sea Level and High Altitude Areas.  
439 *Scientific reports* 2018; 8:10104.
- 440 30. Hildebrand F, Moitinho-Silva L, Blasche S, Jahn MT, Gossmann TI, Huerta-Cepas J, et  
441 al. Antibiotics-induced monodominance of a novel gut bacterial order. *Gut* 2019; 68:1781-90.
- 442 31. Schnorr SL, Candela M, Rampelli S, Centanni M, Consolandi C, Basaglia G, et al. Gut  
443 microbiome of the Hadza hunter-gatherers. *Nat Commun* 2014; 5:3654.

- 444 32. Graf D, Di Cagno R, Fåk F, Flint HJ, Nyman M, Saarela M, et al. Contribution of diet to  
445 the composition of the human gut microbiota. *Microbial ecology in health and disease* 2015;  
446 26:26164.
- 447 33. Obregon-Tito AJ, Tito RY, Metcalf J, Sankaranarayanan K, Clemente JC, Ursell LK, et  
448 al. Subsistence strategies in traditional societies distinguish gut microbiomes. *Nat Commun*  
449 2015; 6:6505.
- 450 34. Klindworth A, Pruesse E, Schweer T, Peplies J, Quast C, Horn M, et al. Evaluation of  
451 general 16S ribosomal RNA gene PCR primers for classical and next-generation sequencing-  
452 based diversity studies. *Nucleic acids research* 2013; 41:e1.
- 453 35. Caporaso JG, Lauber CL, Walters WA, Berg-Lyons D, Huntley J, Fierer N, et al. Ultra-  
454 high-throughput microbial community analysis on the Illumina HiSeq and MiSeq platforms. *The*  
455 *ISME Journal* 2012; 6:1621-4.
- 456 36. Özkurt E, Fritscher J, Soranzo N, Ng DYK, Davey RP, Bahram M, et al. LotuS2: an ul-  
457 trafast and highly accurate tool for amplicon sequencing analysis. *Microbiome* 2022; 10:176.
- 458 37. Callahan BJ, McMurdie PJ, Rosen MJ, Han AW, Johnson AJA, Holmes SP. DADA2:  
459 High-resolution sample inference from Illumina amplicon data. *Nature methods* 2016; 13:581-3.
- 460 38. Frøslev TG, Kjøller R, Bruun HH, Ejrnæs R, Brunbjerg AK, Pietroni C, et al. Algorithm  
461 for post-clustering curation of DNA amplicon data yields reliable biodiversity estimates. *Nat*  
462 *Commun* 2017; 8:1188.
- 463 39. Hauswedell H, Singer J, Reinert K. Lambda: the local aligner for massive biological data.  
464 *Bioinformatics* 2014; 30:i349-55.

- 465 40. Quast C, Pruesse E, Yilmaz P, Gerken J, Schweer T, Yarza P, et al. The SILVA riboso-  
466 mal RNA gene database project: improved data processing and web-based tools. *Nucleic acids*  
467 *research* 2013; 41:D590-6.
- 468 41. Bedarf JR, Beraza N, Khazneh H, Özkurt E, Baker D, Borger V, et al. Much ado about  
469 nothing? Off-target amplification can lead to false-positive bacterial brain microbiome detection  
470 in healthy and Parkinson's disease individuals. *Microbiome* 2021; 9:75.
- 471 42. McMurdie PJ, Holmes S. phyloseq: an R package for reproducible interactive analysis  
472 and graphics of microbiome census data. *PloS one* 2013; 8:e61217.
- 473 43. Saary P, Forslund K, Bork P, Hildebrand F. RTK: efficient rarefaction analysis of large  
474 datasets. *Bioinformatics* 2017; 33:2594-5.
- 475 44. Dixon P. VEGAN, a package of R functions for community ecology. 2003; 14:927-30.
- 476 45. Liu C, Cui Y, Li X, Yao M. microeco: an R package for data mining in microbial com-  
477 munity ecology. *FEMS Microbiology Ecology* 2020; 97.
- 478 46. Shetty SA, Hugenholtz F, Lahti L, Smidt H, de Vos WM. Intestinal microbiome land-  
479 scaping: insight in community assemblage and implications for microbial modulation strategies.  
480 *FEMS Microbiol Rev* 2017; 41:182-99.
- 481
- 482 47. Sudarshan A. Shetty, & Leo Lahti. (2020, October). *microbiomeutilities: Utilities for*  
483 *Microbiome Analytics*.

484

485

486 **Figures legends:**

487 **Figure 1. A)** Summary of the cohort. **B)** A comparison of anthropological factors and serum bio-  
488 chemical markers among *Apong* drinkers and non-drinkers (a) Systolic Blood pressure, (b) Dias-  
489 tolic Blood pressure, (c) Total protein (d) Albumin, (e) Globulin, (f) Albumin/Globulin ratio, (g)  
490 Blood Glucose, (h) Triglycerides, (i) serum glutamic-pyruvic transaminase SGPT, (j) Serum glu-  
491 tamic-oxaloacetic transaminase (SGOT), (k) Bilirubin total and, (l) Bilirubin direct. The proba-  
492 bility of significance is denoted by \*'s, where \*\*\*\* depicts significance level of 0.0001, \*\*\* de-  
493 picts 0.001, \*\* depicts 0.01, \* depicts 0.05. Only significant p-values are indicated.

494 **Figure 2. A)** Relative abundance of microbial taxa at phylum level in *Apong* drinkers and non-  
495 drinkers. **B)** Top ten microbial families that are differentially abundant among *Apong* drinkers  
496 and non-drinkers. Only significant p-values are indicated. **C)** Venn diagram of microbial features  
497 (ASVs) shared between different drink type groups or special to each group.

498  
499 **Figure 3. A)** Microbial diversity of *Apong* drinkers and non-drinkers as estimated by ASV rich-  
500 ness and Shannon and Chao1 indices. **B)** The inferred variance (adjusted R<sup>2</sup>) explained by each  
501 identified covariate as determined by PERMANOVA, calculated based on weighted UniFrac and  
502 Bray–Curtis dissimilarities. Statistically significant covariates with an adjusted  $p < 0.05$  using  
503 the Benjamini–Hochberg (BH) method are shown. **C)** PCoA of the weighted UniFrac and Bray-  
504 Curtis distances of the gut bacterial composition of *Apong* drinkers and non-drinkers. **D)** Disper-  
505 sion (i.e. distance to centroid of the groups) of each drink type group in the PCoA plots.

506 **Figure 4.** Top ten fecal metabolites that are differentially abundant among *Apong* drinkers and  
507 non-drinkers. Only significant p-values are indicated.



508 **Figure 5. A)** Top ten highest correlations between gut microbial taxa at family level and fecal  
509 metabolites. **B)** PCoA of the Bray-Curtis distances of the fecal metabolites of *Apong* drinkers  
510 and non-drinkers. The table shows explained variance by drink type (*Nogo*, *Poro*, and non-  
511 drinker) for microbial and fecal metabolites composition.

512 **Figure 6.** Composition of the four short chain fatty acids (SCFAs) in the fecal samples of *Apong*  
513 drinkers and non-drinkers. Only significant p-values are indicated. “ms” denotes marginal  
514 significance.

515 **Supplementary Figure 1:** Microbial diversity of *Apong* drinkers estimated by ASV richness:  
516 “low-drinkers” (less than 250 ml per day), “medium-drinkers” (250-500 ml per day), and “high-  
517 drinkers” (more than 500 ml per day).

518 **Supplementary Figure 2:** PCoA of the weighted UniFrac and Bray-Curtis distances of the gut  
519 bacterial composition of *Apong* drinkers and non-drinkers where colors depict *Nogin*, *Poro*, and  
520 non-drinkers and shapes depict different locations.

521 **Supplementary Figure 3:** Composition of the four short chain fatty acids (SCFAs) in the fecal  
522 samples of the participants

523 **Supplementary Table 1:** Correlations between gut microbial taxa at family level and fecal me-  
524 tabolites.

**A**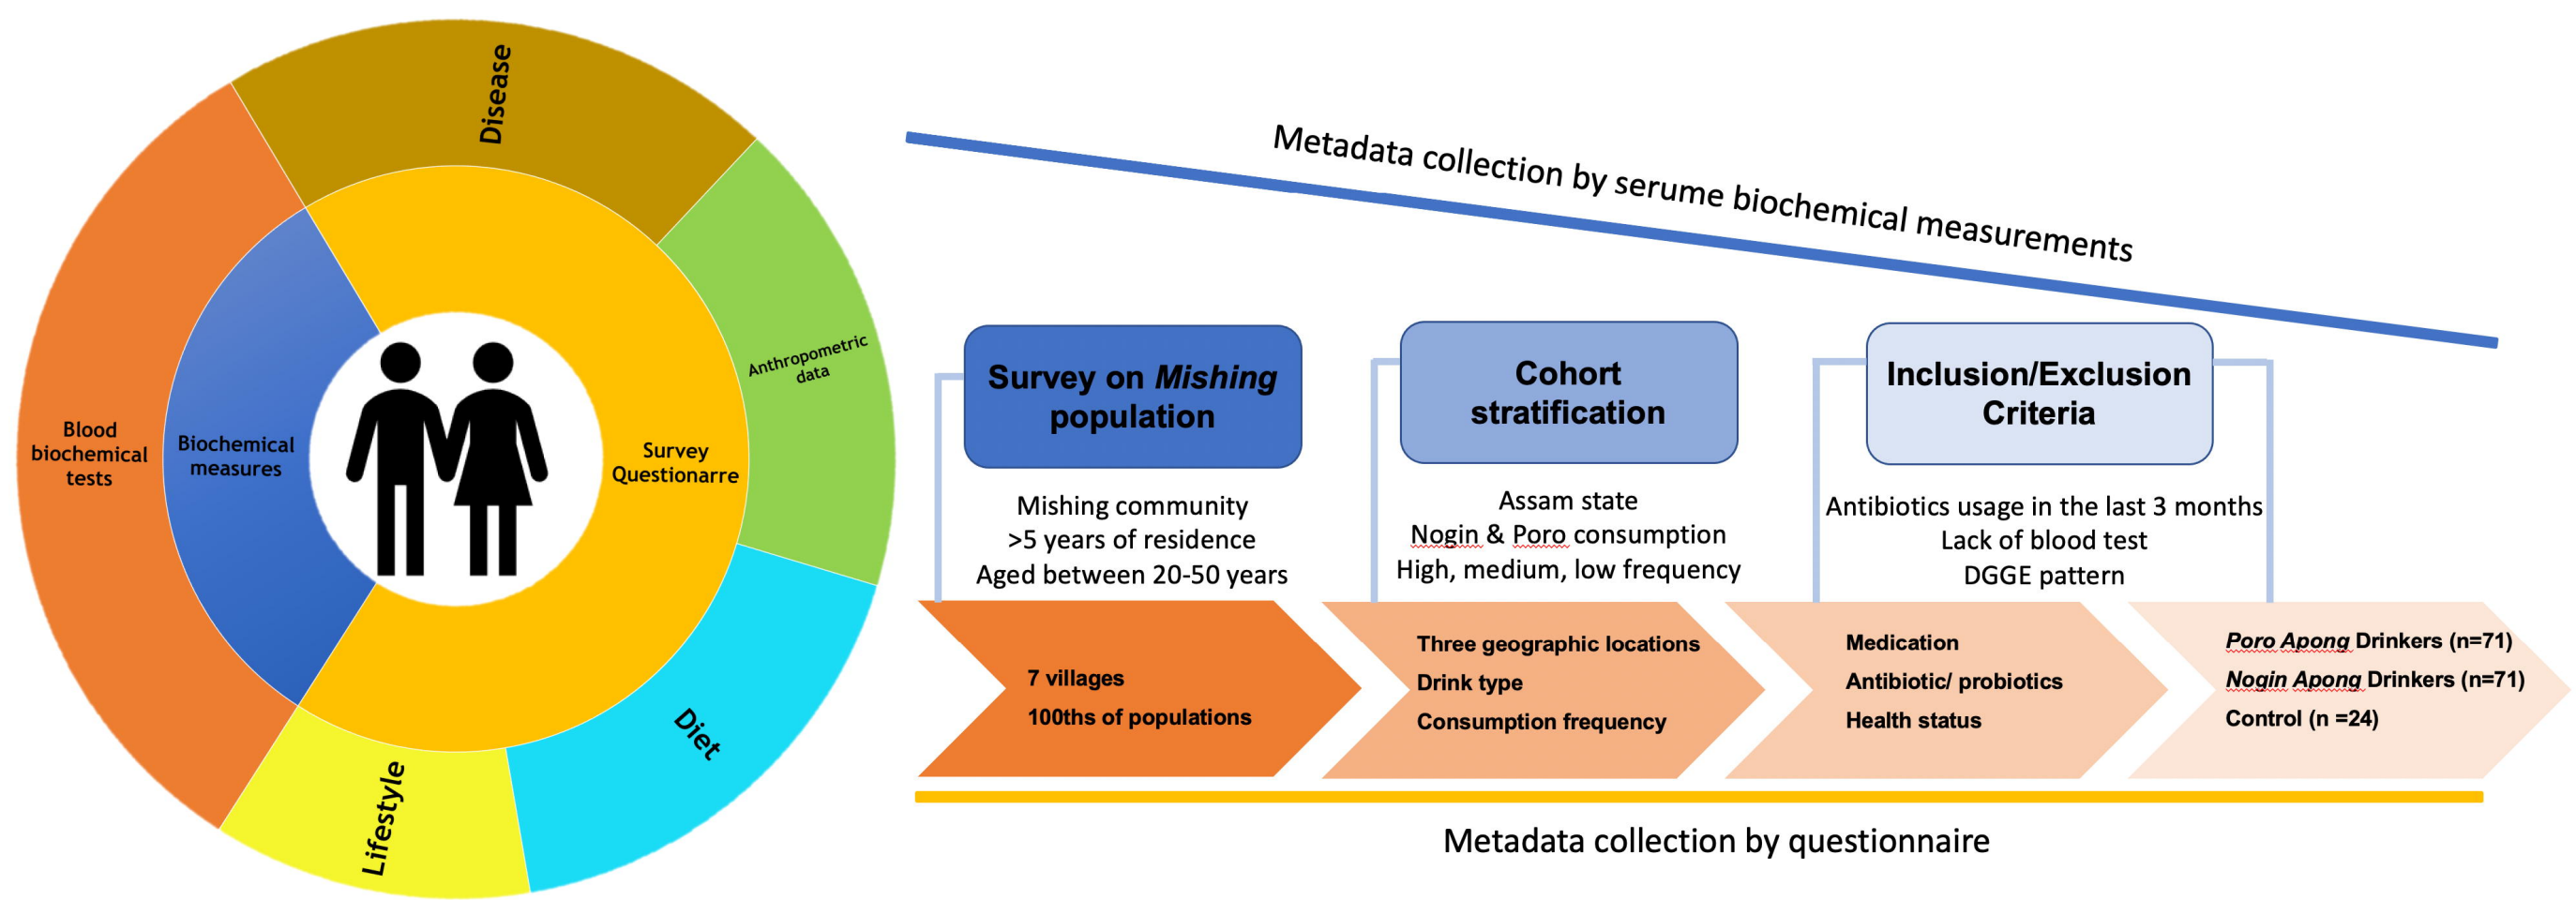**B**

## Summary of the biochemical measurements of the participants

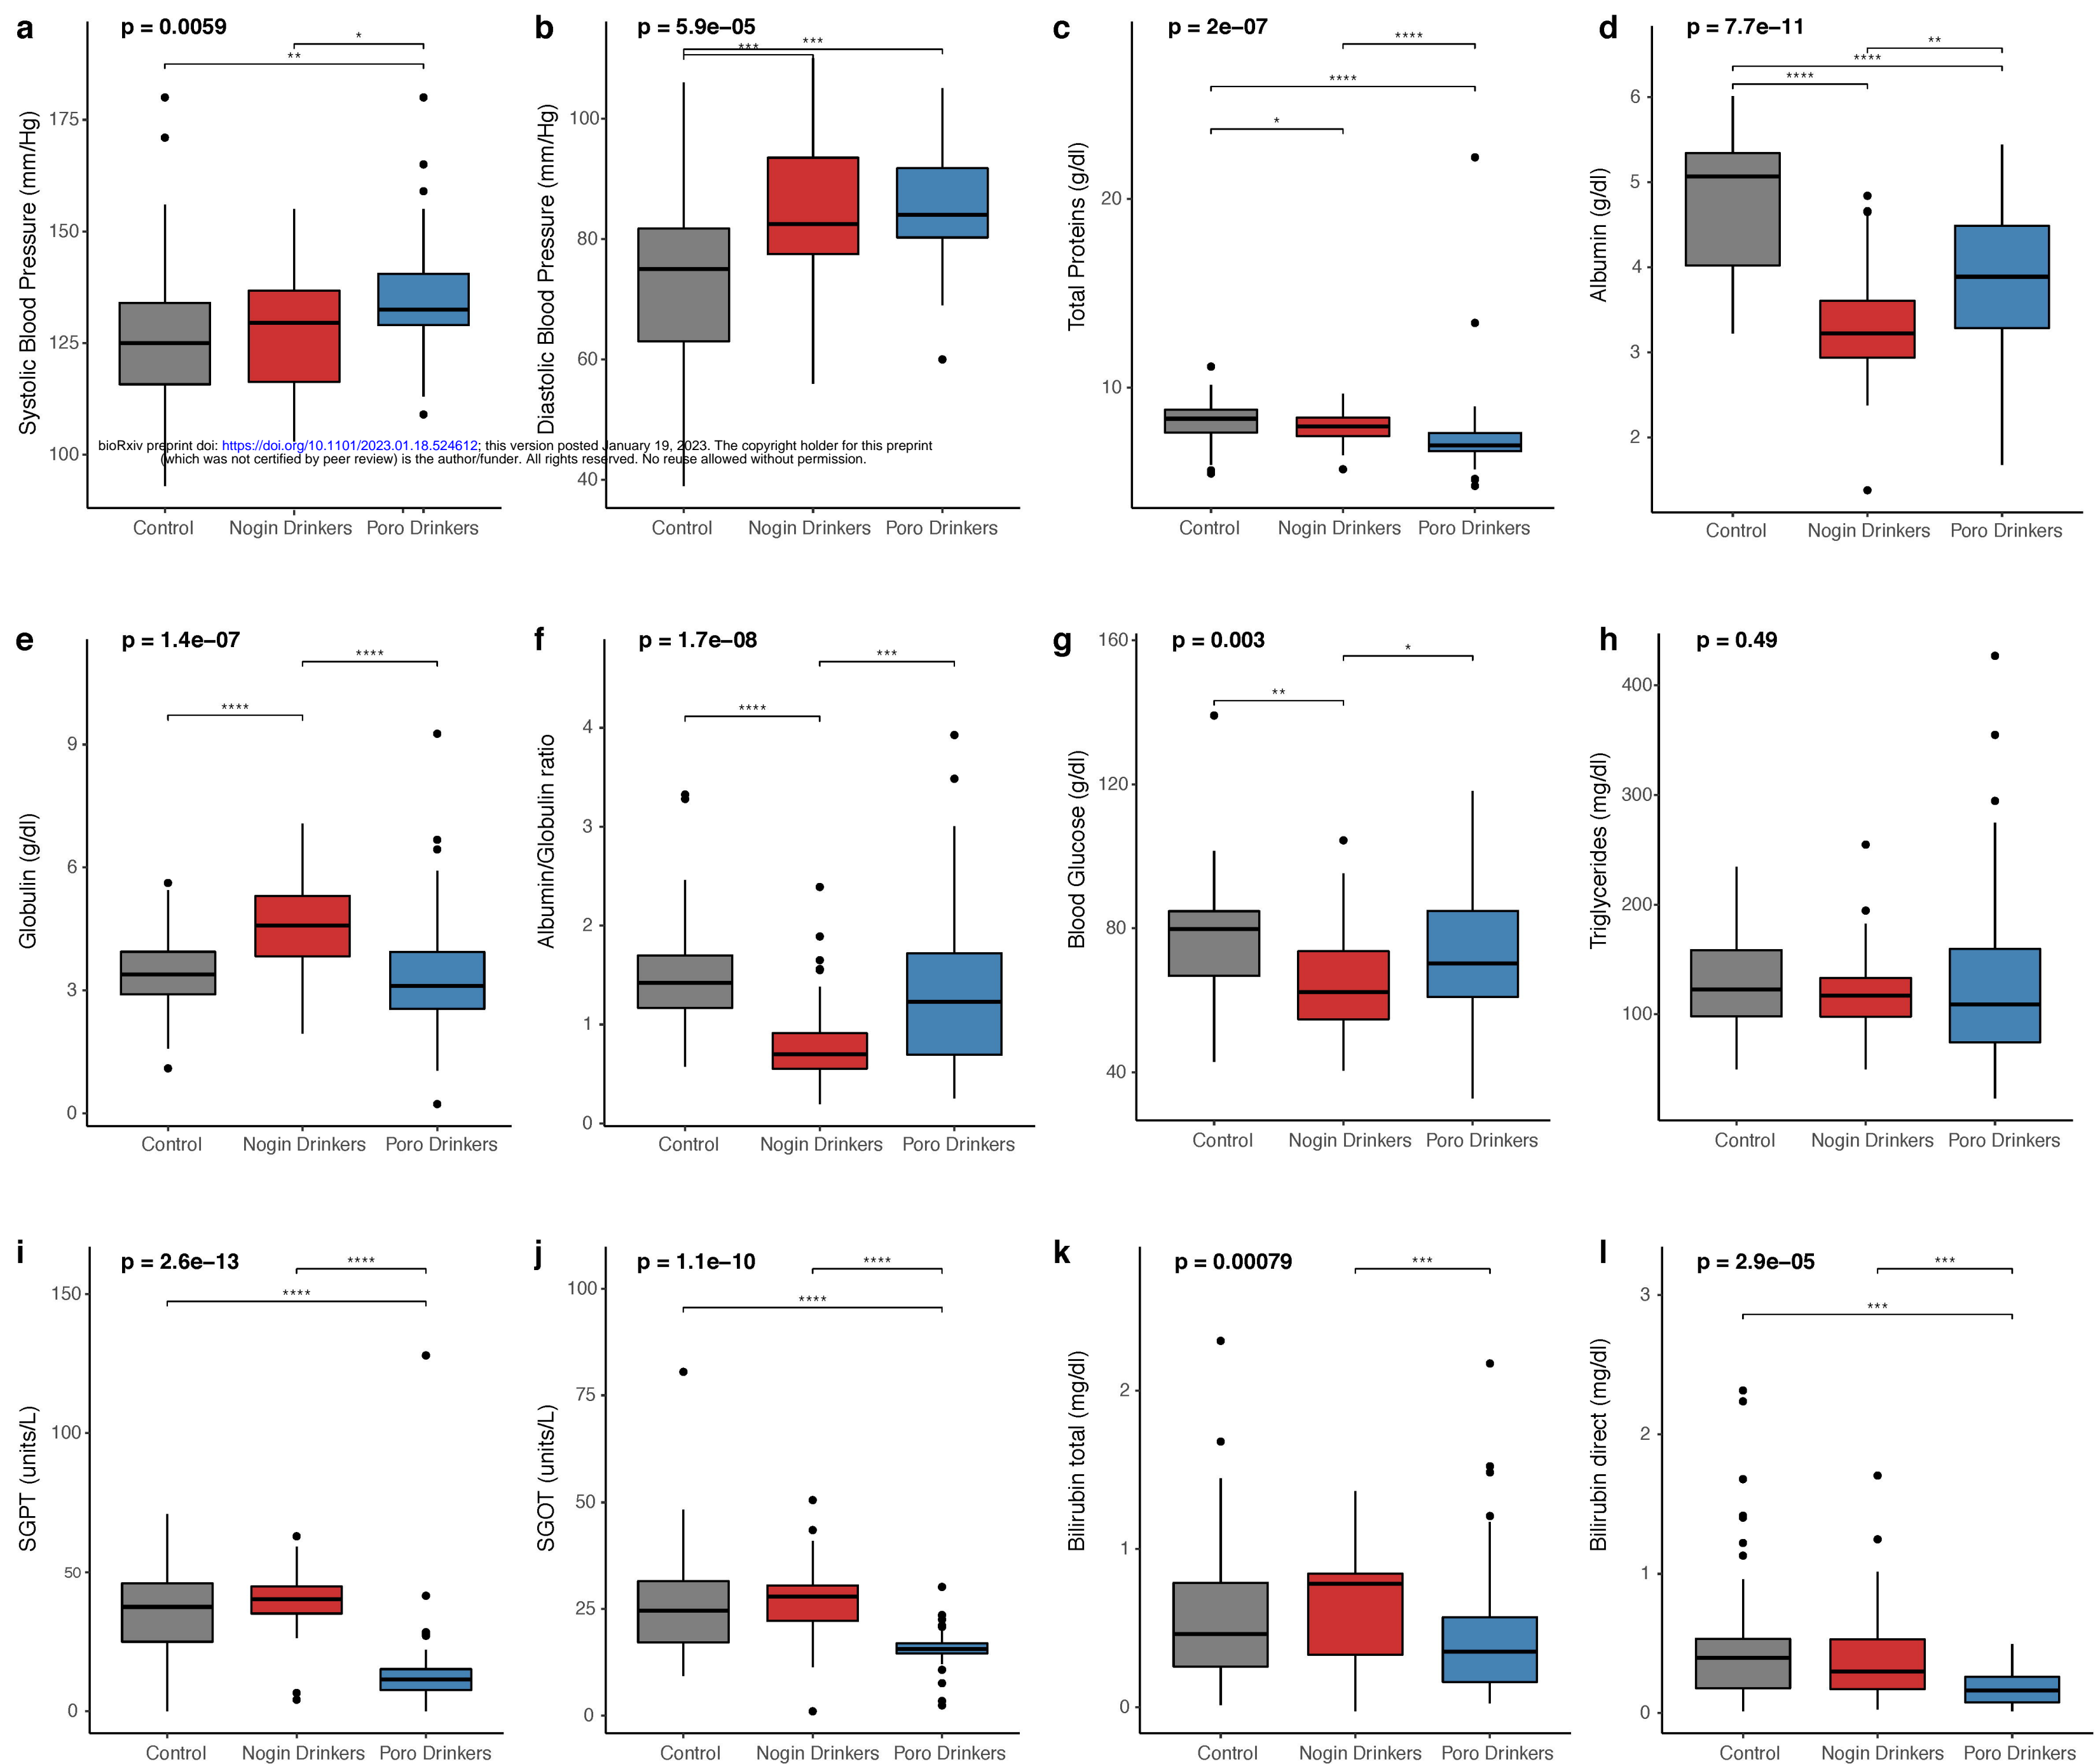

**A**

bioRxiv preprint doi: <https://doi.org/10.1101/2023.01.18.524612>; this version posted January 19, 2023. The copyright holder for this preprint (which was not certified by peer review) is the author/funder. All rights reserved. No reuse allowed without permission.

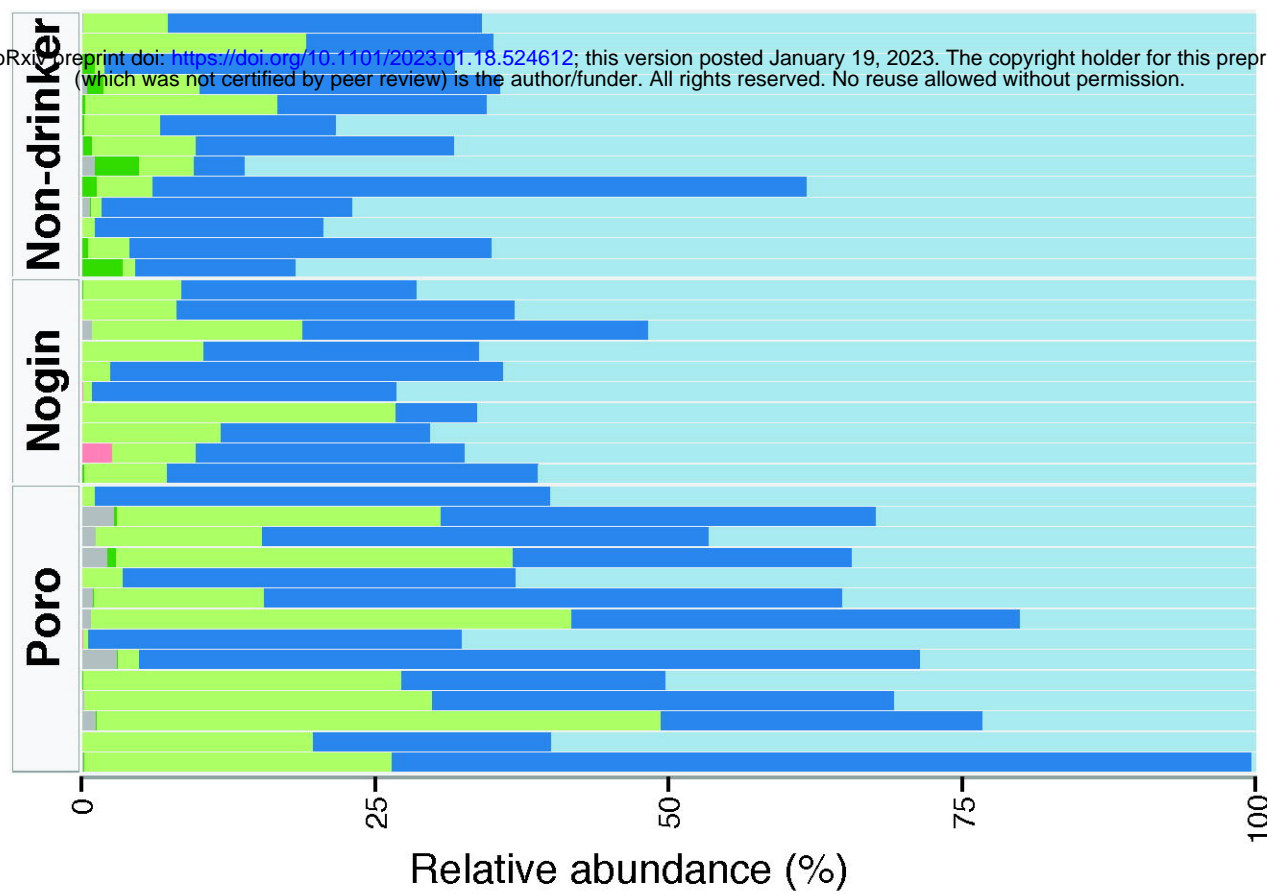**B**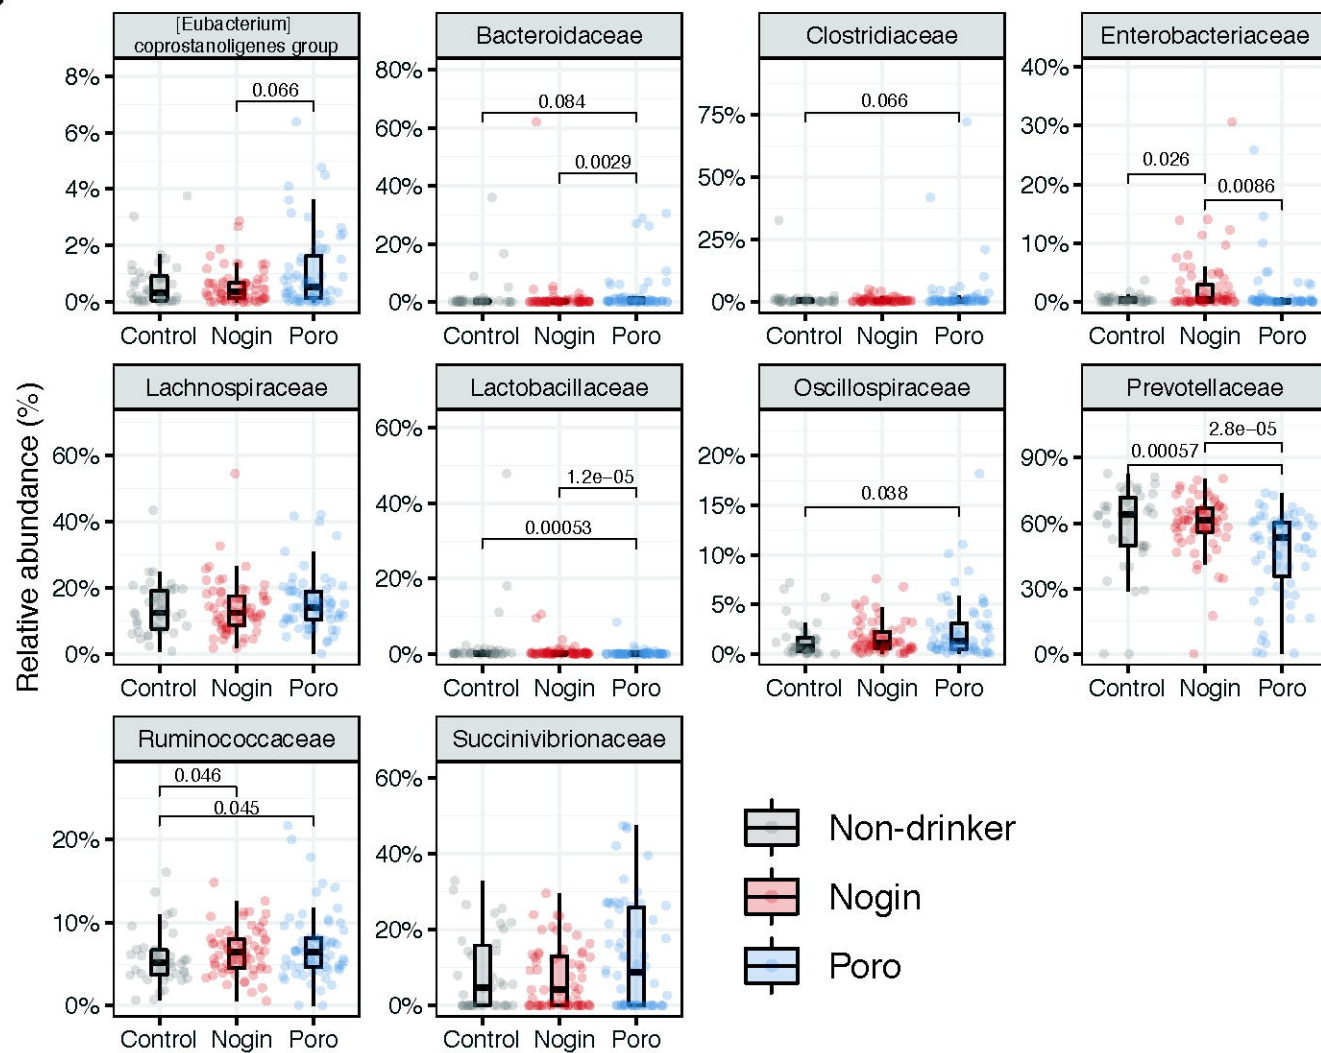**C**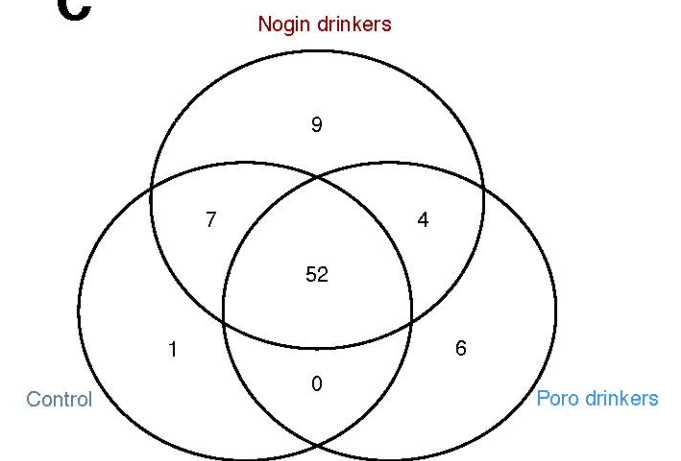

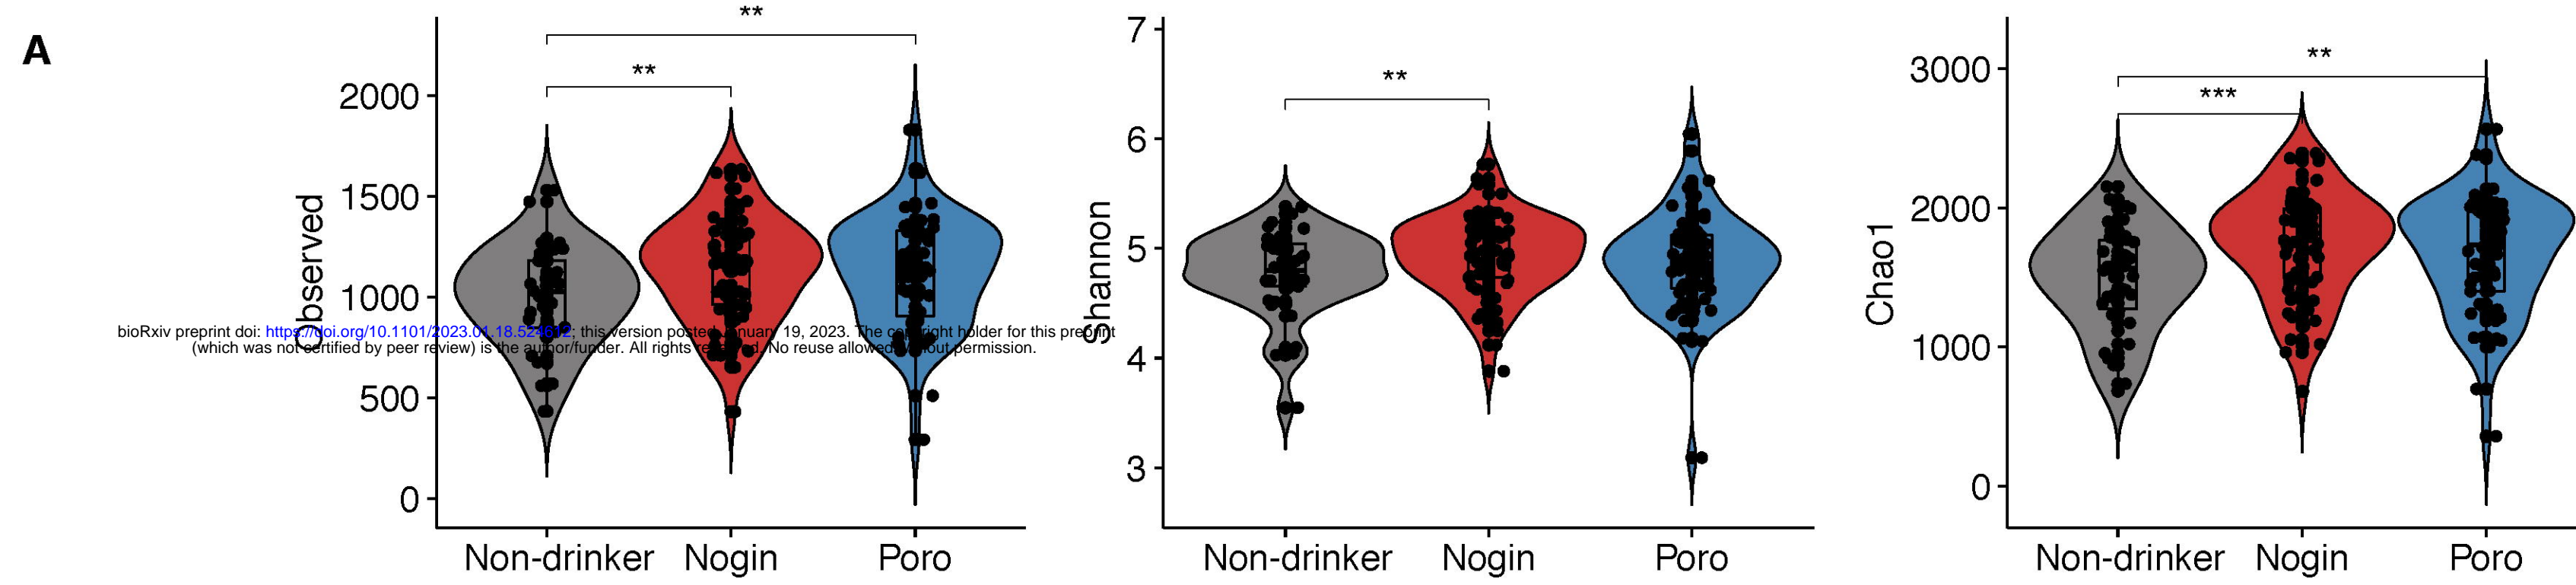

**B** \*\*\* < 0.001, \*\* < 0.01, \* < 0.05

**Weighted UniFrac distance**

**Bray-Curtis distance**

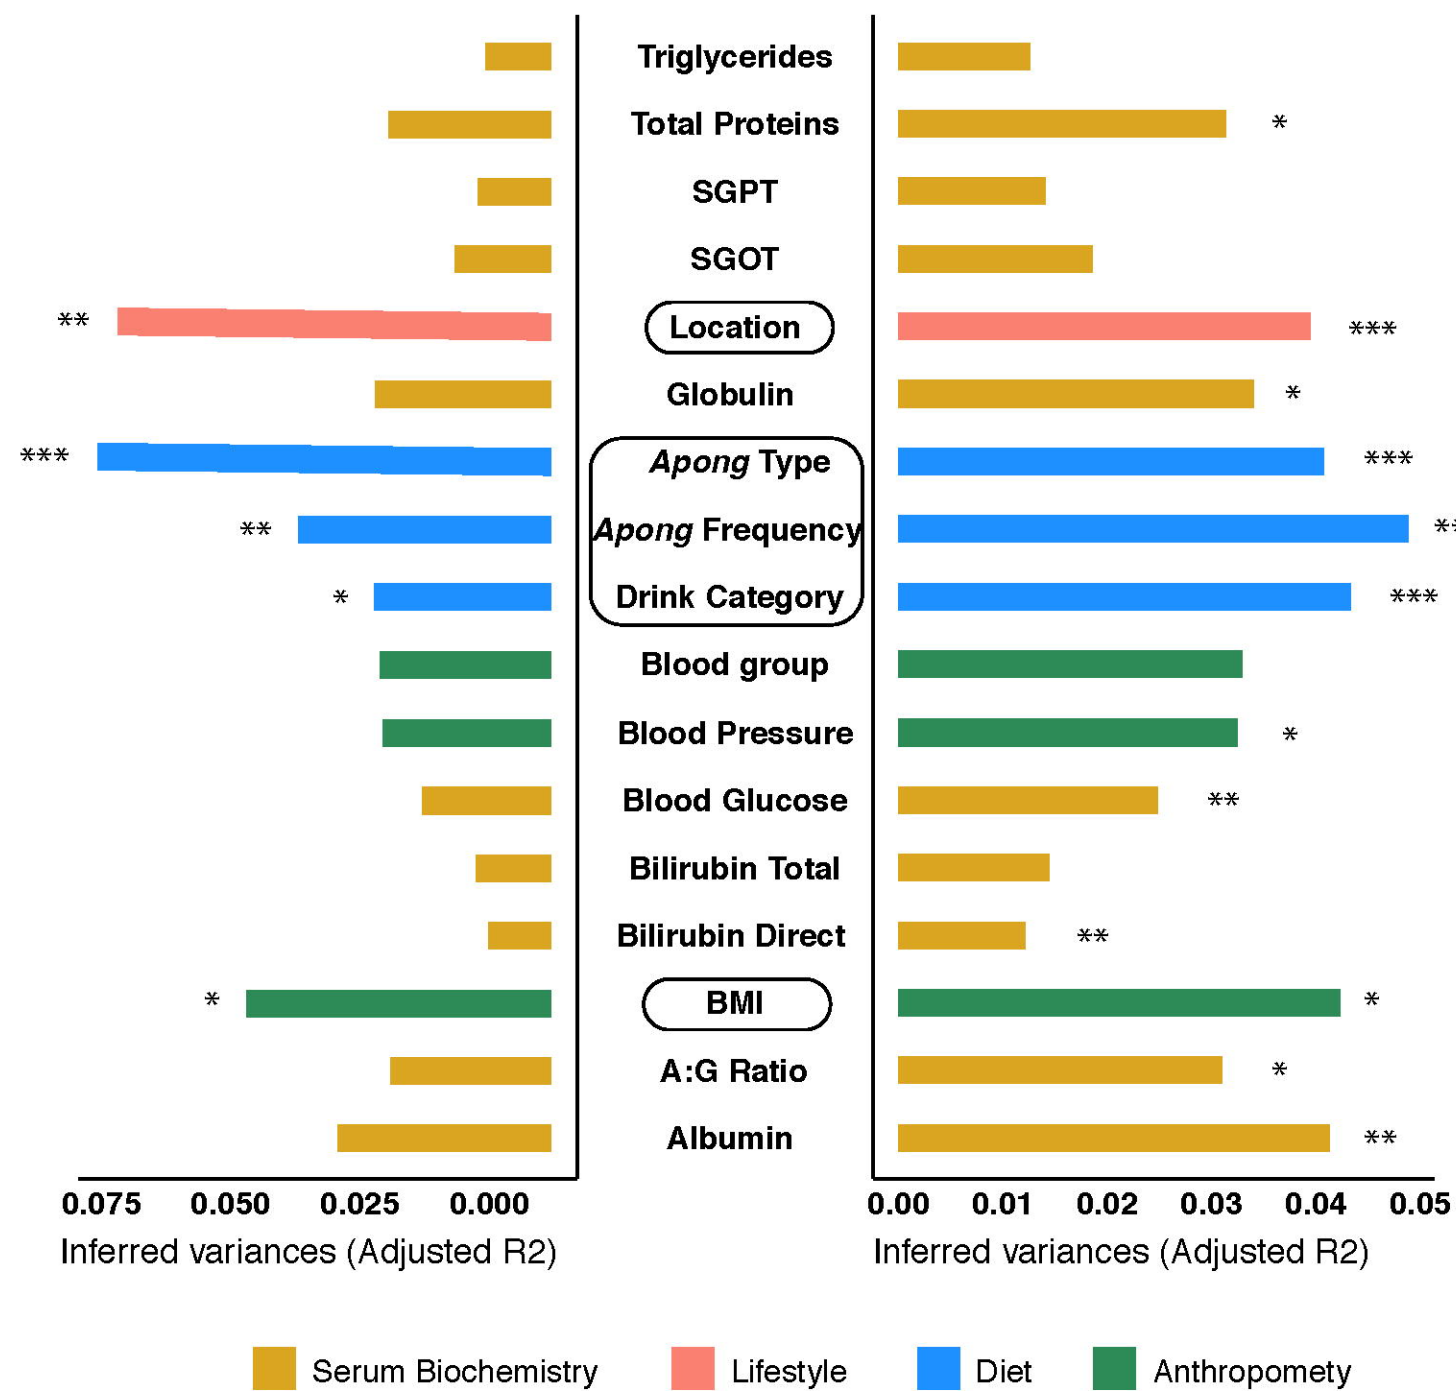

**C**

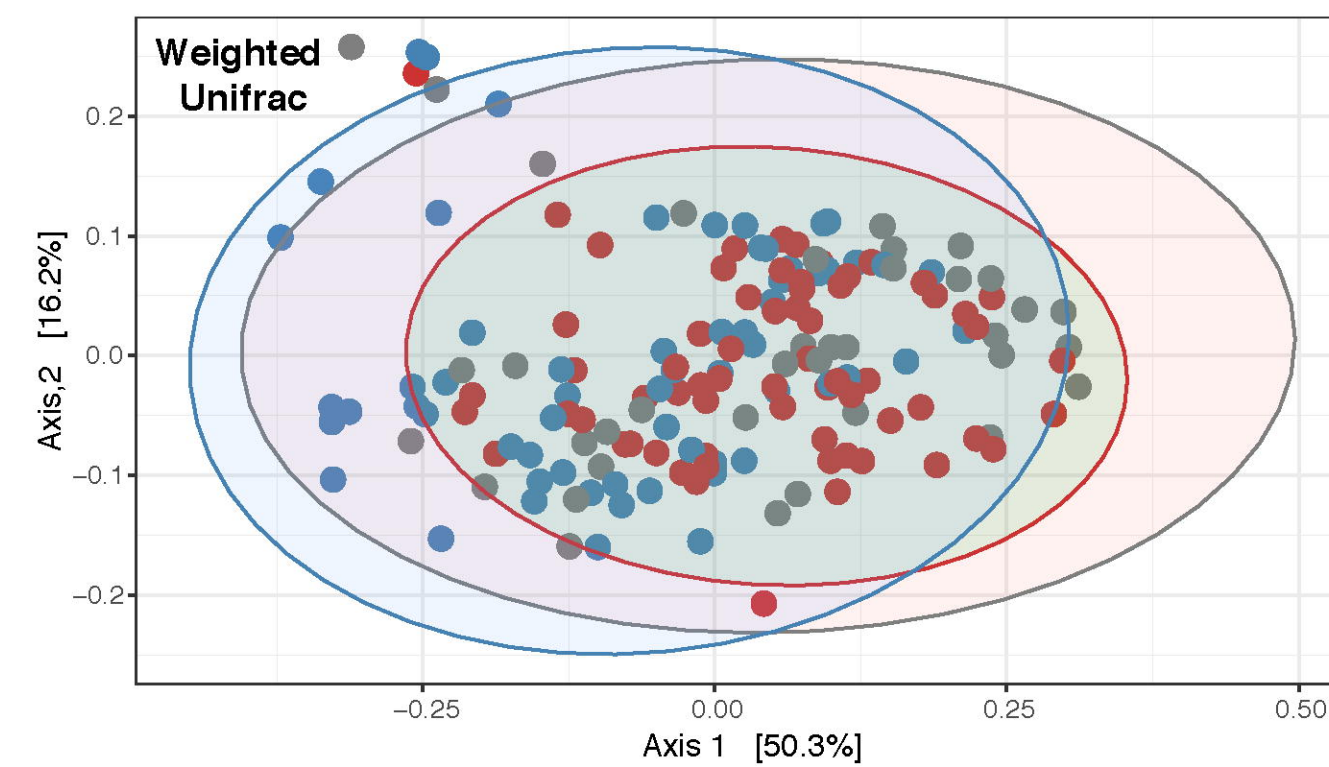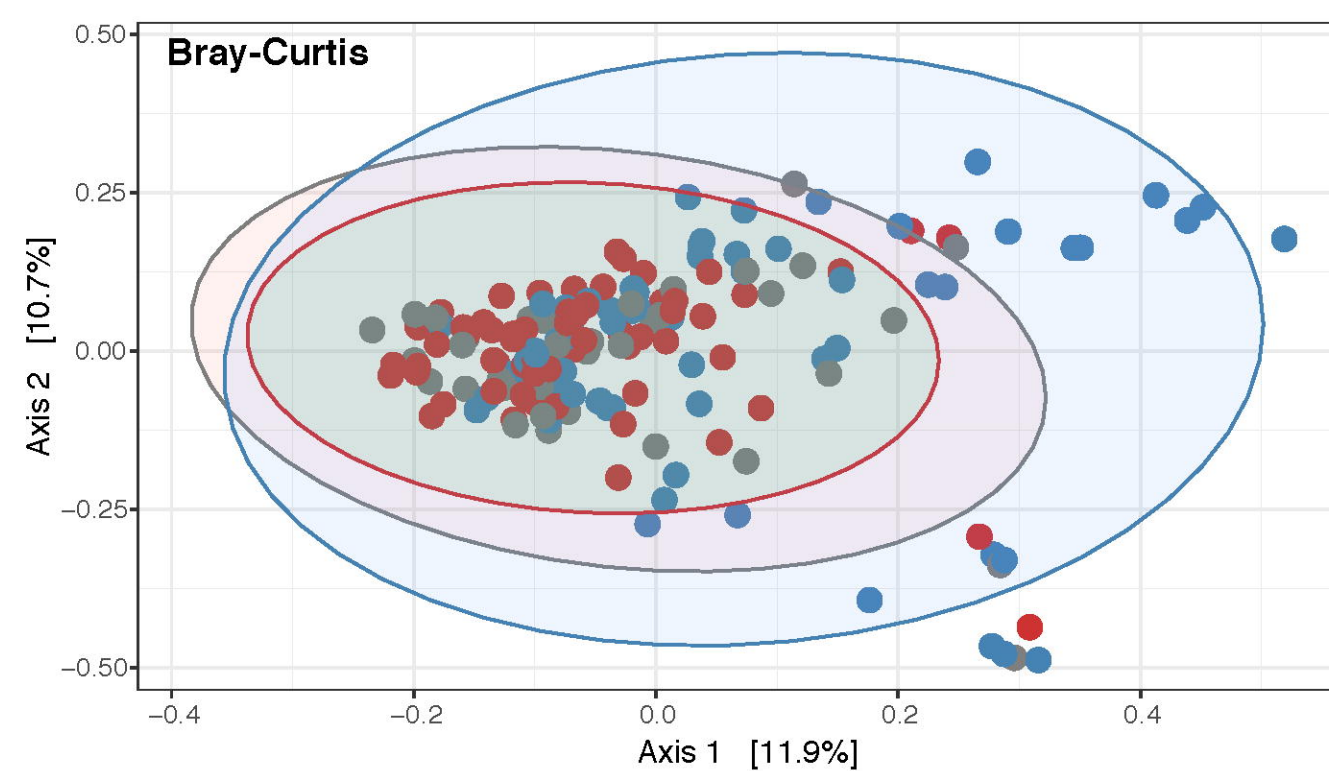

**D**

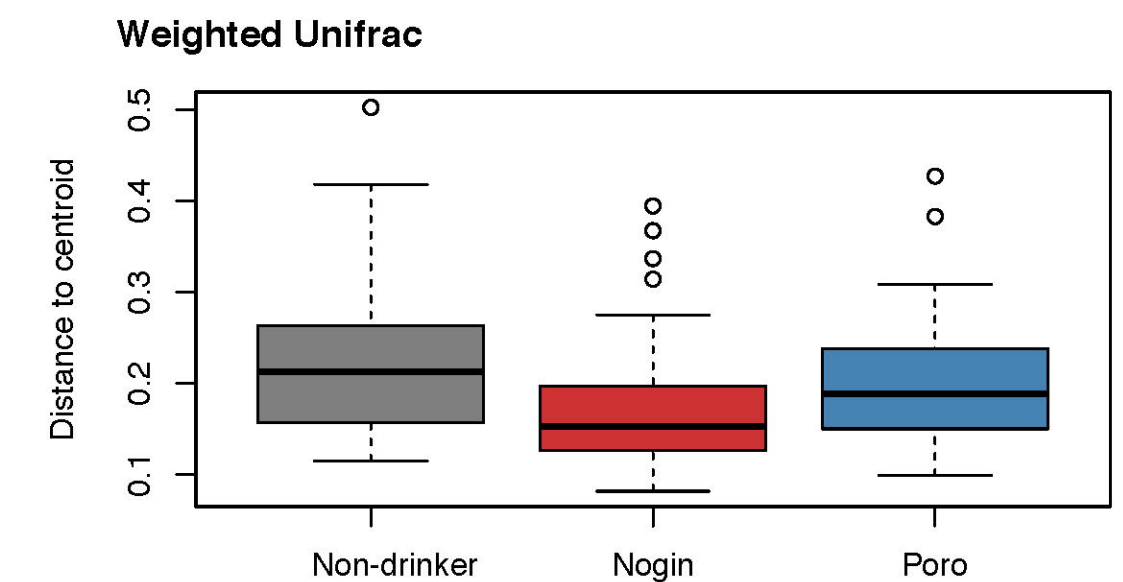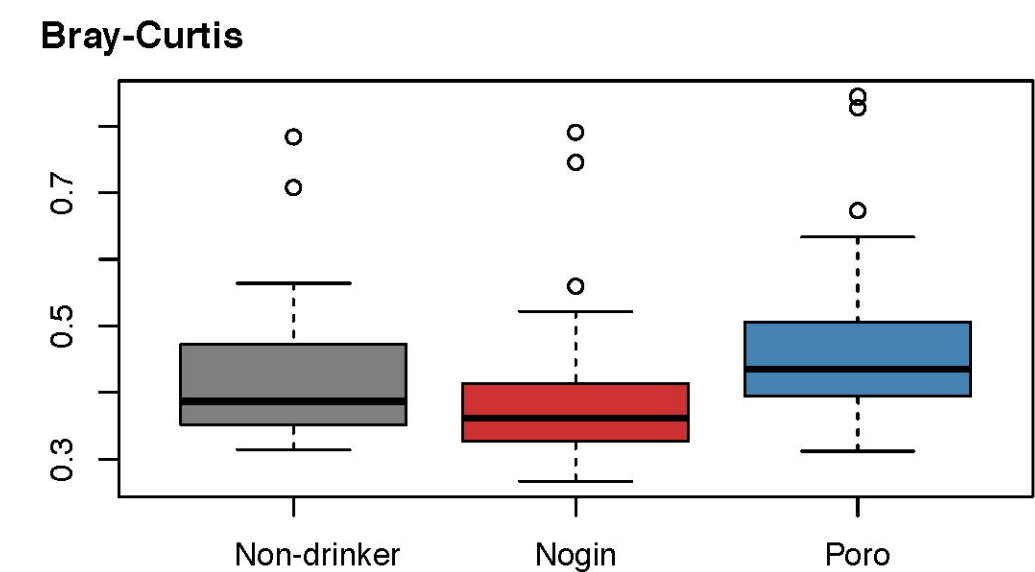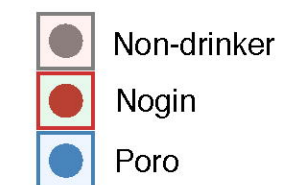

# Top ten metabolites

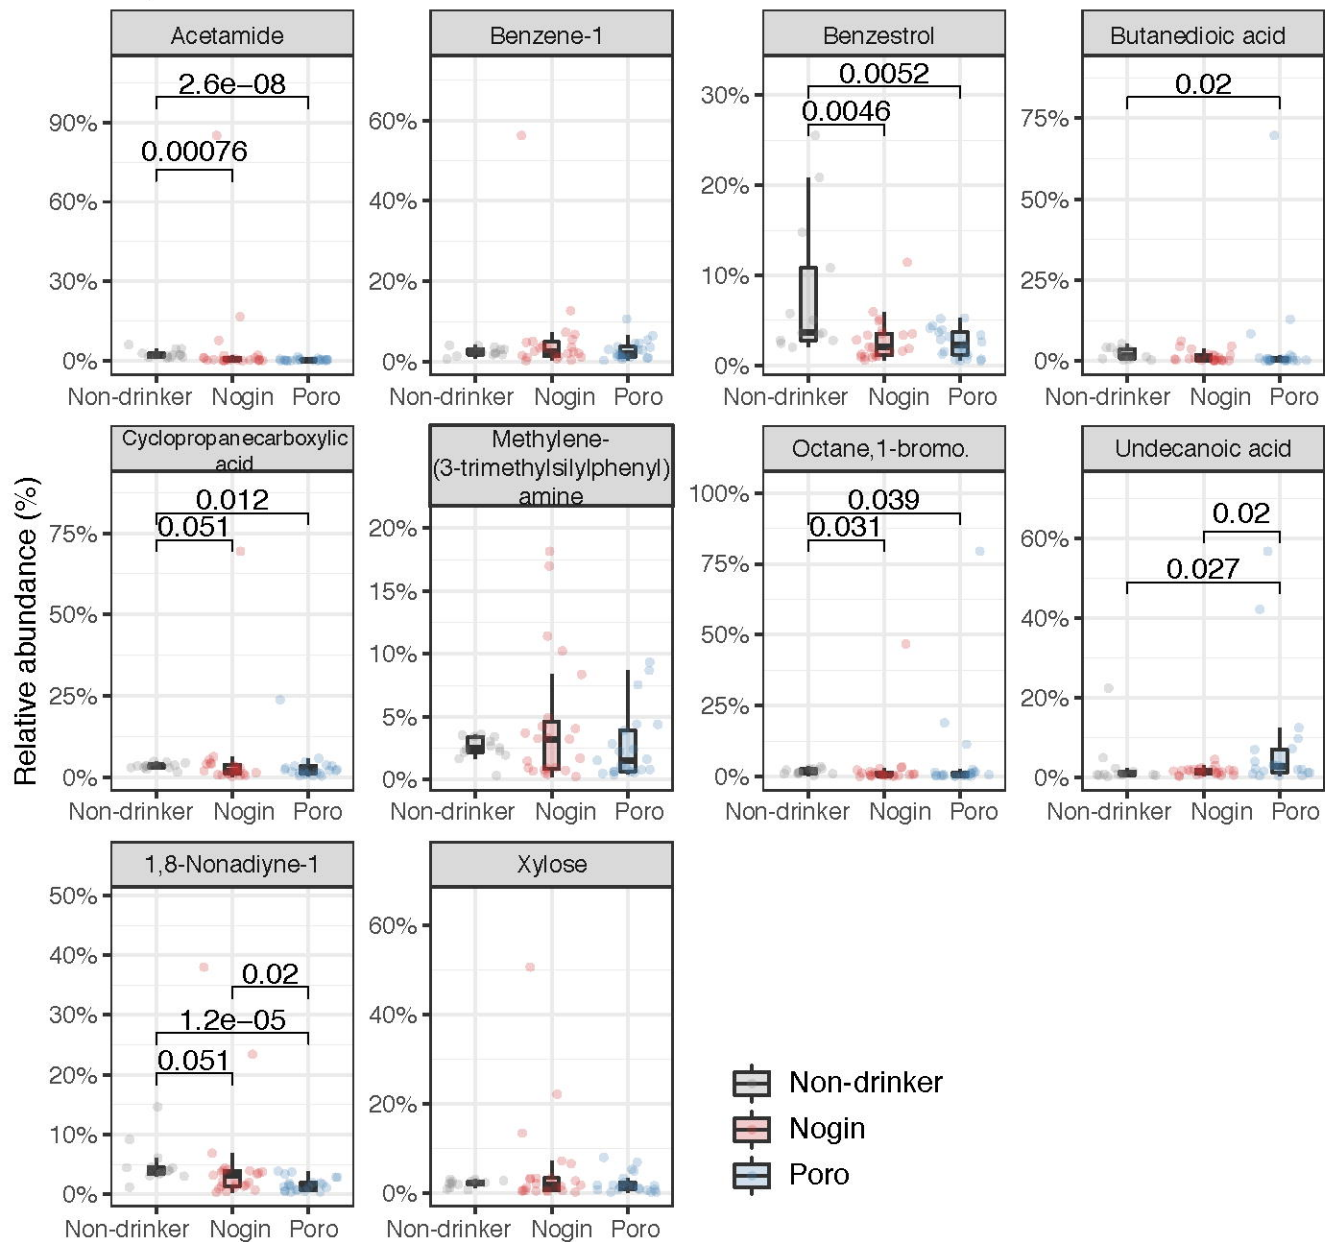

**A**

Top 10 correlating microbial taxa and metabolites

| taxa (family)        | metabolite                      | rho         | p value  | adjusted p value |
|----------------------|---------------------------------|-------------|----------|------------------|
| Clostridiaceae       | Dimethylmalonic acid            | 0.933214976 | 4.07E-26 | 1.40E-22         |
| Clostridiaceae       | 1,6-Bis(2-propyn-1-yloxy)hexane | 0.932759101 | 4.88E-26 | 1.40E-22         |
| Selenomonadaceae     | Decanoic acid                   | 0.92445005  | 1.08E-24 | 2.05E-21         |
| Clostridiaceae       | Urea                            | 0.91609472  | 1.73E-23 | 2.47E-20         |
| Clostridiaceae       | 5-(4H)-Oxazolones               | 0.907582075 | 2.20E-22 | 2.51E-19         |
| Clostridiaceae       | 2,4-Hexadien-1-ol               | 0.881270757 | 1.51E-19 | 1.44E-16         |
| unknown Bacteroidota | Dodecanedioic acid              | 0.876080983 | 4.58E-19 | 3.74E-16         |
| unknown Bacteroidota | Butanedioic acid                | 0.864326188 | 4.72E-18 | 3.37E-15         |
| unknown Bacteroidota | Cyclopentane                    | 0.848294141 | 8.17E-17 | 5.19E-14         |
| unknown Bacteroidota | Trifluoroacetoxypentadecane     | 0.832590054 | 9.87E-16 | 5.64E-13         |

**B**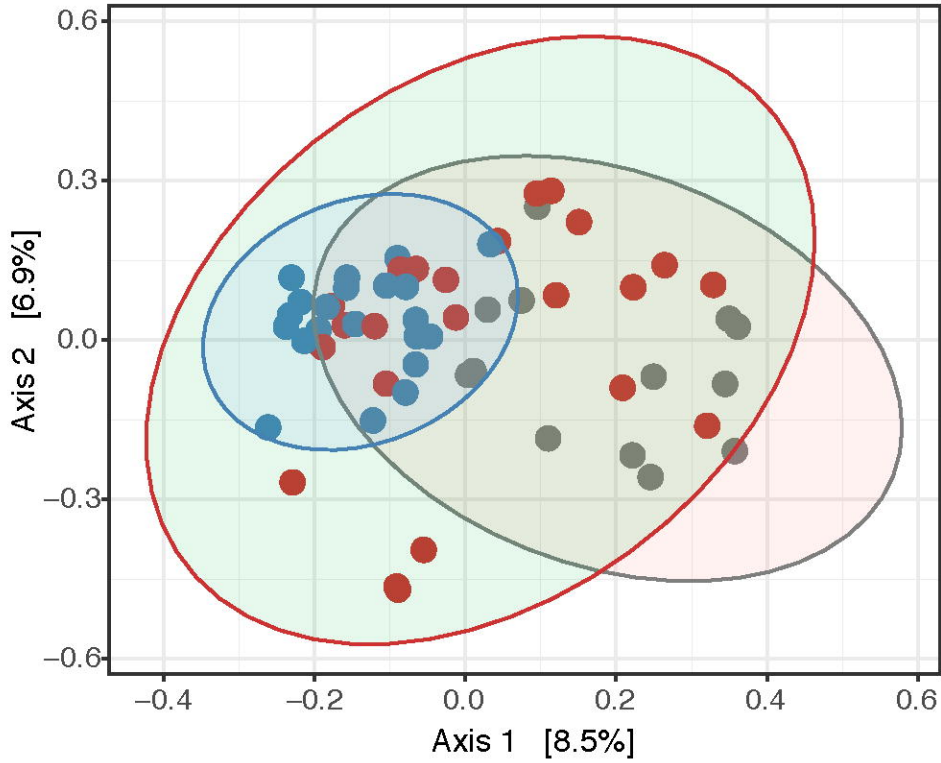

| microbial composition  |                     |              |
|------------------------|---------------------|--------------|
| metrics                | explained variation | significance |
| Bray-Curtis            | 3,45                | ***          |
| weighted UniFrac       | 6,259               | ***          |
| metabolite composition |                     |              |
| Bray-Curtis            | 8,66                | ***          |

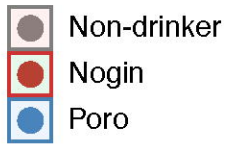

Relative abundance

Acetic acid

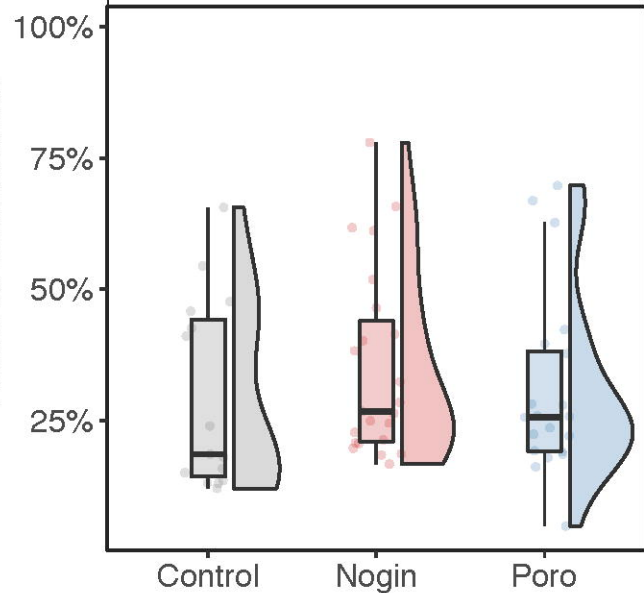

Propionic acid

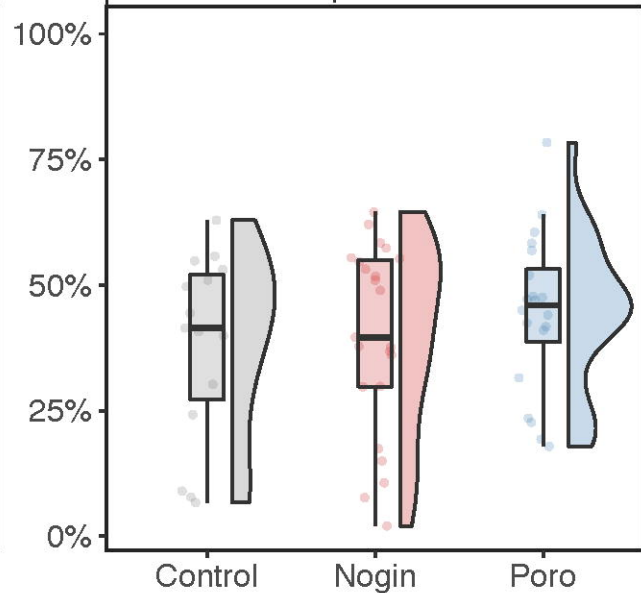

Butyric acid

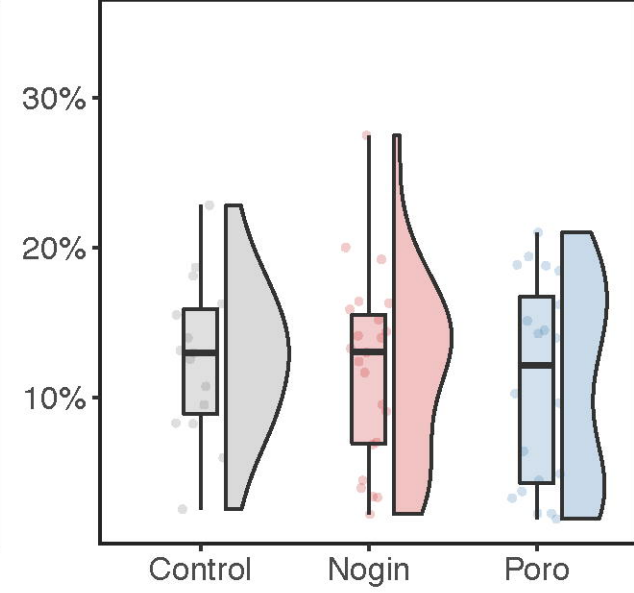

Iso-valeric acid

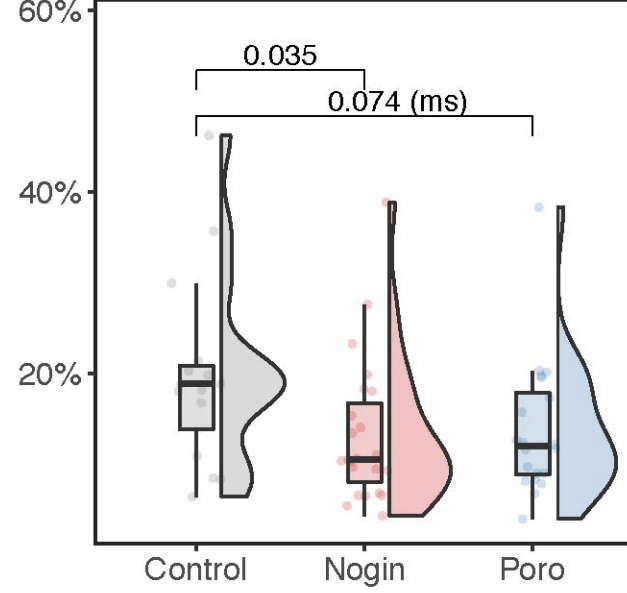

Source: https://www.biorxiv.org/content/10.1101/2023.01.18.524612v1.full.pdf
